# Supplementary material for: Proteome-wide mendelian randomization study implicates therapeutic targets in common cancers
Source: J Transl Med. 2023 Sep 21;21:646. doi: 10.1186/s12967-023-04525-5 (PMC10512580; doi:10.1186/s12967-023-04525-5)
Supplement: Supplementary file 1 — Additional file 1: Table S1. Instrumental variables of plasma proteins used in MR analysis. Table S2. The sources for all statistical summary datasets used in this study. Table S3. Casual effects between 3 site-specific cancers and 13 identified proteins in the bidirectional MR analysis. Table S4. The results of heterogeneity analysis. Table S5. Investigating the Previous Genome-Wide Significant Associations of SNPs as Genetic Instruments for Potential Causal Proteins. Table S6. Genetic Instruments for Drug Targets Validated in External Validation. Table S7. Current anticancer medications and corresponding targets for cancer treatment. Table S8. Current medications targeting potential causal proteins. Table S9. Distinct target groups of identified proteins. Figure S1. Colocalization Analysis of Plasma Proteins for prostate cancer. The diamond purple points represent SNPs that exhibit the lowest combined P-value in both protein GWAS and cancer GWAS analyses. Figure S2. Colocalization Analysis of Plasma Proteins for breast cancer.The diamond purple points represent SNPs that exhibit the lowest combined P-value in both protein GWAS and cancer GWAS analyses. Figure S3. Colocalization Analysis of Plasma Proteins for lung cancer. The diamond purple points represent SNPs that exhibit the lowest combined P-value in both protein GWAS and cancer GWAS analyses. Figure S4. Protein–protein interaction network between identified proteins and cancer-associated medication targets. Green circles represent the targets of current medications for prostate cancer; Red circles represent potential drug targets identified in this study; Blue circles represent the current medications targets that interact with potential drug targets. R-detailed code. [file 12967_2023_4525_MOESM1_ESM.zip › Table S1.xlsx]

## Sheet: Sheet1
Table S1. Instrumental variables of plasma proteins used in MR analysis
exposure	UniProt	SNP	chr.exposure	pos.exposure	effect_allele.exposure	other_allele.exposure	beta.exposure	se.exposure	pval.exposure	eaf.exposure	samplesize.exposure	Author	id.exposure	F_statistics
ACP1	A0A140VK37;P24666;Q59EH3	rs11553746	2	272203	T	C	1.237	0.026037	1e-200	0.324799	996	Suhre	A0A140VK37;P24666;Q59EH3	2257.13
ACP5	A0A024R7F8;P13686	rs79061565	19	11698659	G	C	-0.4845	0.0364	1.6e-40	0.122794	3301	Sun	A0A024R7F8;P13686	177.168
ADA2	Q9NZK5;B4E3Q4;A0A087X0I3	rs2231495	22	17669306	C	T	-0.8794	0.0214	1e-200	0.332516	3301	Sun	Q9NZK5;B4E3Q4;A0A087X0I3	1688.67
ADAM23	A0A024R3W8;O75077;E7EWD3	rs1921673	2	207324282	G	A	0.4321	0.0255	3.2e-64	0.6846	3301	Sun	A0A024R3W8;O75077;E7EWD3	287.136
ADAMTS13	Q76LX8	rs71503194	9	136298131	G	T	-0.8719	0.0404	4.4e-103	0.091229	3301	Sun	Q76LX8	465.769
ADGRE2	A0JNV7;Q9UHX3	rs7260110	19	14501544	G	A	0.2969	0.0447098	5.169e-11	0.35994	996	Suhre	A0JNV7;Q9UHX3	44.0977
ADM	P35318	rs2923091	11	10358145	A	G	-0.204	0.025	2.28e-16	0.662	6861	Yao	P35318	66.5856
AFM	P43652	rs41265665	4	74361142	A	G	-0.8615	0.121941	3.033e-12	0.0323559	989	Suhre	P43652	49.9123
AGT	B0ZBE2;B2R5S1;P01019	rs2493151	1	230878561	A	G	0.3349	0.0494802	2.223e-11	0.234909	994	Suhre	B0ZBE2;B2R5S1;P01019	45.8107
AHSG	P02765	rs35094235	3	186328951	G	T	0.6252	0.0255	2e-132	0.731004	3301	Sun	P02765	601.115
AKR1A1	P14550;V9HWI0	rs72688441	1	46051053	A	G	-1.18	0.0493	1.2e-126	0.058959	3301	Sun	P14550;V9HWI0	572.889
AKR1B1	A0A024R7A8;P15121	rs2229542	7	134135621	C	T	-0.8187	0.1045	4.7e-15	0.014337	3301	Sun	A0A024R7A8;P15121	61.3786
AKR1C1	Q04828	rs145648894	10	5009739	G	T	0.3894	0.0393	3.8e-23	0.111375	3301	Sun	Q04828	98.1763
ALCAM	Q13740;B3KNN9	rs9830049	3	105284045	C	T	-0.306	0.0374	2.8e-16	0.120272	3301	Sun	Q13740;B3KNN9	66.9421
ALDH3A1	P30838;Q6PKA6;I3L3I9	rs887241	17	19645938	C	A	0.2421	0.0259	7.8e-21	0.661635	3301	Sun	P30838;Q6PKA6;I3L3I9	87.3756
AMY1A	P04745;Q6NSB3	rs7538379	1	104067356	T	C	-1.0399	0.062	4.9e-63	0.039949	3301	Sun	P04745;Q6NSB3	281.319
ANG	P03950;W0UV28	rs17114671	14	21155270	C	T	0.8064	0.0595669	1.918e-38	0.118857	997	Suhre	P03950;W0UV28	183.27
ANGPTL1	A0A024R908;O95841	rs16853043	1	178545926	G	A	0.4305	0.0247	5.4e-68	0.352388	3301	Sun	A0A024R908;O95841	303.775
APCS	P02743;V9HWP0	rs71632673	1	159536213	A	C	-0.8369	0.082	1.9e-24	0.022925	3301	Sun	P02743;V9HWP0	104.164
APMAP	Q9HDC9	rs8125909	20	24975835	C	A	0.2967	0.0363	2.8e-16	0.132064	3301	Sun	Q9HDC9	66.807
APOA5	A0A0B4RUS7;Q6Q788	rs964184	11	116648917	C	G	0.2625	0.0363	4.9e-13	0.868979	3301	Sun	A0A0B4RUS7;Q6Q788	52.2932
APOB	P04114;Q59HB3;Q7Z7Q0	rs520354	2	21259612	G	A	0.3033	0.0416763	6.929e-13	0.473394	996	Suhre	P04114;Q59HB3;Q7Z7Q0	52.9622
APOL1	O14791;Q2KHQ6;B1AH95	rs71314970	22	36638705	T	C	-0.3659	0.0409	3.5e-19	0.105762	3301	Sun	O14791;Q2KHQ6;B1AH95	80.0347
ARFIP1	B4E273;P53367;Q8N8M9;B7ZA10	rs4619875	4	153701130	T	C	0.239	0.0248	6.6e-22	0.403628	3301	Sun	B4E273;P53367;Q8N8M9;B7ZA10	92.8736
ARSB	A0A024RAJ9;P15848;A8K4A0	rs13159135	5	78196689	C	G	-0.214	0.0248	5.9e-18	0.433907	3301	Sun	A0A024RAJ9;P15848;A8K4A0	74.4602
ART3	Q13508	rs4859610	4	77000441	G	A	-0.3378	0.0286	3e-32	0.774293	3301	Sun	Q13508	139.504
ART4	Q93070	rs1001096	12	14988455	A	G	0.74	0.0217	1e-200	0.397358	3301	Sun	Q93070	1162.9
ASAH2;ASAH2B	Q9NR71;P0C7U1	rs10740617	10	52027609	C	A	0.6665	0.0281	2e-124	0.793543	3301	Sun	Q9NR71;P0C7U1	562.584
ASPH	Q12797;B7ZM96;A0A0A0MSK8;B4DQ07	rs112760834	8	62540134	T	G	-0.5784	0.0688	4.1e-17	0.033209	3301	Sun	Q12797;B7ZM96;A0A0A0MSK8;B4DQ07	70.6773
ASPN	Q9BXN1;Q6P528	rs2516568	9	95187380	T	A	-0.4724	0.025	2.3e-79	0.323246	3301	Sun	Q9BXN1;Q6P528	357.059
ATP1B2	P14415	rs1642762	17	7554772	T	C	-0.2881	0.0255	1.5e-29	0.586879	3301	Sun	P14415	127.646
B3GAT3	Q5U676;G3V150;O94766	rs12794886	11	62383715	C	G	0.4422	0.0264	8.3e-63	0.707032	3301	Sun	Q5U676;G3V150;O94766	280.562
B4GALT1	P15291;W6MEN3	rs7019909	9	33113322	T	C	0.4478	0.0402	7.9e-29	0.102573	3301	Sun	P15291;W6MEN3	124.084
B4GALT2	O60909	rs2286241	1	44440769	C	G	-0.673	0.052	3e-38	0.056172	3301	Sun	O60909	167.503
BPI	P17213	rs1780617	20	36974157	G	A	-0.6444	0.0371	1.1e-67	0.12241	3301	Sun	P17213	301.692
BPIFB1	Q8TDL5	rs2424961	20	31694060	T	C	-0.4366	0.0245	3.9e-71	0.578579	3301	Sun	Q8TDL5	317.567
BST1	Q10588	rs73224660	4	15714762	A	G	-1.3967	0.0239	1e-200	0.158997	3301	Sun	Q10588	3415.16
C1QC	A0A024RAA7;P02747	rs78865058	1	22944209	A	G	1.0754	0.0603	4.3e-71	0.041707	3301	Sun	A0A024RAA7;P02747	318.057
C1QTNF5	A0A024R3F8;Q9BXJ0	rs2248863	11	119207341	A	G	0.3261	0.0345	3.5e-21	0.141788	3301	Sun	A0A024R3F8;Q9BXJ0	89.3436
C7	P10643;Q05CI3	rs429017	5	41263091	A	G	0.4333	0.0495145	9.039e-18	0.252792	985	Suhre	P10643;Q05CI3	76.5794
CA10	Q9NS85	rs117399000	17	50213731	A	G	-0.5939	0.0662	3e-19	0.037436	3301	Sun	Q9NS85	80.4842
CA13	Q8N1Q1	rs17741049	8	86198253	T	C	-0.7441	0.0799159	7.915e-20	0.0682046	997	Suhre	Q8N1Q1	86.6954
CA3	P07451;V9HWA3	rs2072696	8	86351051	C	G	-0.2169	0.0289	6.8e-14	0.23803	3301	Sun	P07451;V9HWA3	56.3279
CA6	B4DUH8;P23280	rs3765963	1	9034598	G	A	0.6766	0.0233	4.1e-185	0.402359	3301	Sun	B4DUH8;P23280	843.242
CACNA2D3	Q8IZS8	rs34084772	3	54153517	A	G	-0.2329	0.0323	5.1e-13	0.184066	3301	Sun	Q8IZS8	51.9917
CAPN1;CAPNS1	B2RDI5;P07384;B4DWH5;P04632;A0A0C4DGQ5	rs10895987	11	64904908	T	C	-0.4591	0.050931	1.007e-18	0.225628	995	Suhre	B2RDI5;P07384;B4DWH5;P04632;A0A0C4DGQ5	81.2549
CASP3	P42574	rs870825	4	185588045	G	A	-0.3955	0.0581561	1.8e-11	0.156784	995	Suhre	P42574	46.249
CBLN1	P23435	rs10852587	16	49006458	A	T	-1.0805	0.0327	1e-200	0.143622	3301	Sun	P23435	1091.83
CBLN4	Q9NTU7	rs74447607	20	54447947	T	C	-0.2177	0.0312	3e-12	0.191752	3301	Sun	Q9NTU7	48.6864
CBR1	P16152	rs16993864	21	37446599	A	C	-1.2151	0.0827	6.6e-49	0.021978	3301	Sun	P16152	215.88
CBR3	O75828;V9HW40	rs1028997	21	37532222	A	G	-0.764	0.0222	1e-200	0.375555	3301	Sun	O75828;V9HW40	1184.35
CCDC126	A0A024RA08;Q96EE4	rs227934	7	23627287	T	C	-0.2749	0.0246	6.9e-29	0.47897	3301	Sun	A0A024RA08;Q96EE4	124.876
CCL14	Q16627	rs9903158	17	34312337	C	T	-1.0813	0.0499	3.5e-104	0.05615	3301	Sun	Q16627	469.56
CCL15	A0A0B4J2E2;Q16663	rs854624	17	34327923	T	G	-1.6912	0.039	1e-200	0.930513	3301	Sun	A0A0B4J2E2;Q16663	1880.45
CCL16	O15467	rs112689088	17	34307457	C	T	-1.5245	0.0336	1e-200	0.097531	3301	Sun	O15467	2058.62
CCL18	P55774	rs9904601	17	34372006	A	G	0.8634	0.0595566	2.482e-43	0.116968	996	Suhre	P55774	210.167
CCL23	P55773	rs712048	17	34326215	C	A	0.7289	0.0353	1.6e-94	0.873722	3301	Sun	P55773	426.37
CCL25	O15444	rs74959615	19	8121096	A	G	-0.9718	0.0428	5.2e-114	0.078294	3301	Sun	O15444	515.545
CCL3L1	P16619	rs2015086	17	34391617	G	A	0.496	0.0364	3.1e-42	0.131452	3301	Sun	P16619	185.678
CCL4	P13236	rs6607368	17	34819136	A	C	0.51	0.0441039	6.3e-31	0.8	3394	Folkersen	P13236	133.717
CCL5	D0EI67;P13501	rs4239252	17	34163565	A	G	-0.3458	0.052581	7.825e-11	0.211345	996	Suhre	D0EI67;P13501	43.2506
CCL8	P80075	rs3138036	17	32647544	G	A	-0.4704	0.0601323	1.326e-14	0.145436	997	Suhre	P80075	61.1955
CCNH	P51946	rs2230641	5	86695274	G	A	-0.2386	0.0309	1.2e-14	0.205375	3301	Sun	P51946	59.6244
CD14	P08571	rs3138074	5	140015932	A	T	0.332	0.022	9.22e-53	0.777	6861	Yao	P08571	227.736
CD177	A0A087WVM2;Q8N6Q3	rs73554000	19	43825494	C	G	1.8032	0.0787	4.4e-116	0.023826	3301	Sun	A0A087WVM2;Q8N6Q3	524.975
CD200R1	Q8TD46	rs6791672	3	112591392	A	G	-0.1759	0.0252	2.8e-12	0.590611	3301	Sun	Q8TD46	48.7226
CD300C	Q08708	rs62087214	17	72467626	G	A	-0.6787	0.0637	1.7e-26	0.038512	3301	Sun	Q08708	113.521
CD33	P20138;Q546G0	rs12459419	19	51728477	T	C	-0.9436	0.0209	1e-200	0.329168	3301	Sun	P20138;Q546G0	2038.37
CD48	A0A087X1S7;P09326	rs12124234	1	160675269	C	G	0.2639	0.0252	1.1e-25	0.405154	3301	Sun	A0A087X1S7;P09326	109.667
CD55	P08174;B1AP13	rs11580387	1	207418408	G	A	-0.5211	0.0279	4.7e-78	0.233948	3301	Sun	P08174;B1AP13	348.846
CD59	P13987;Q6FHM9	rs2273121	11	33757770	A	G	-0.362	0.027	4.7e-41	0.251594	3301	Sun	P13987;Q6FHM9	179.759
CD5L	O43866	rs2765501	1	157804648	G	A	-0.285	0.018	4.76e-54	0.608	6861	Yao	O43866	250.694
CDNF	Q49AH0	rs61738953	10	14862082	G	C	-0.6293	0.0681	2.5e-20	0.041783	3301	Sun	Q49AH0	85.3928
CDON	Q4KMG0	rs3740909	11	125889526	T	C	-0.8286	0.0779154	4.415e-25	0.0730111	993	Suhre	Q4KMG0	113.095
CEL	B4DSX9;O75612;Q86SR3;X6R868	rs8193016	9	135917744	T	C	0.6854	0.0681	8.3e-24	0.034777	3301	Sun	B4DSX9;O75612;Q86SR3;X6R868	101.296
CFH	A0A024R962;P08603;A0A0D9SG88	rs2274700	1	196682947	A	G	0.3665	0.0243	1.6e-51	0.398961	3301	Sun	A0A024R962;P08603;A0A0D9SG88	227.476
CFHR5	Q9BXR6	rs35662416	1	196967354	A	G	-1.2002	0.0682	3e-69	0.030392	3301	Sun	Q9BXR6	309.698
CFI	A8K3L0;P05156;B4DRF2;Q8WW88;G3XAM2	rs7439493	4	110656730	A	G	0.3116	0.0246	8.9e-37	0.415959	3301	Sun	A8K3L0;P05156;B4DRF2;Q8WW88;G3XAM2	160.444
CHIT1	Q13231	rs872583	1	203184766	C	T	-1.0982	0.0247	1e-200	0.20154	3301	Sun	Q13231	1976.83
CHL1	O00533;A0A087X0M8	rs1015456	3	107776	C	T	-0.2082	0.0255	3.2e-16	0.391779	3301	Sun	O00533;A0A087X0M8	66.6624
CHRDL2	Q6WN34	rs11607100	11	74414919	T	C	-0.6419	0.0609	5.8e-26	0.041669	3301	Sun	Q6WN34	111.096
CHST9	Q7L1S5;A0A024RC28	rs9952639	18	24709604	C	G	0.3331	0.0263	7.2e-37	0.31788	3301	Sun	Q7L1S5;A0A024RC28	160.412
CKM	B2R892;P06732	rs11559024	19	45821183	C	T	-0.6788	0.0844	9.1e-16	0.021509	3301	Sun	B2R892;P06732	64.6843
CLEC12A	Q5QGZ9	rs2961544	12	10136672	A	G	-1.2541	0.0132	1e-200	0.639327	3301	Sun	Q5QGZ9	9026.44
CLEC3B	E9PHK0;A0A024R2Q7;P05452	rs2056320	3	45092415	G	A	0.213	0.209	1.38e-23	0.763	6861	Yao	E9PHK0;A0A024R2Q7;P05452	1.03864
CLIC5	Q53G01;Q9NZA1;Q49AE1	rs35822882	6	45916999	T	G	-0.7339	0.0684	7.4e-27	0.033649	3301	Sun	Q53G01;Q9NZA1;Q49AE1	115.123
CLMP	B4E3S3;Q9H6B4	rs35483681	11	123045730	T	C	0.2494	0.0246	4.5e-24	0.553649	3301	Sun	B4E3S3;Q9H6B4	102.783
CLPS	A0A087WZW1;A0A087X0Q7;P04118	rs9380534	6	35751572	A	G	0.4476	0.0251	3.5e-71	0.602276	3301	Sun	A0A087WZW1;A0A087X0Q7;P04118	318.004
CNDP1	Q96KN2	rs17817077	18	72209543	A	G	0.35	0.0439797	4.72e-15	0.405528	995	Suhre	Q96KN2	63.3331
CNTFR	P26992	rs10972159	9	34593086	A	G	-0.6996	0.0941	1e-13	0.017903	3301	Sun	P26992	55.2739
CNTN1	Q12860;A0A024R104	rs1838343	12	41196230	C	T	0.207	0.021	6.45e-24	0.58	6861	Yao	Q12860;A0A024R104	97.1633
CNTN2	A0A024R9B4;Q02246;A1L3A3	rs2071533	1	205012198	G	T	-0.7705	0.0349	6.9e-108	0.865176	3301	Sun	A0A024R9B4;Q02246;A1L3A3	487.41
CNTN4	A0A024R2E5;Q8IWV2	rs163352	3	3098041	C	G	-0.3249	0.0319	2.7e-24	0.81339	3301	Sun	A0A024R2E5;Q8IWV2	103.733
CNTN5	O94779	rs1461672	11	99175378	T	C	0.734	0.0823064	2.241e-18	0.0613065	995	Suhre	O94779	79.5288
CNTNAP2	A0A090N7T7;B2RCH4;Q9UHC6	rs10274393	7	145378588	C	G	-0.4332	0.0264	1.1e-60	0.711014	3301	Sun	A0A090N7T7;B2RCH4;Q9UHC6	269.258
COCH	O43405	rs34907608	14	31330413	A	G	0.4759	0.0366	1e-38	0.118636	3301	Sun	O43405	169.071
COL15A1	B3KTP7;P39059	rs41305481	9	101767385	G	A	0.2437	0.027	1.9e-19	0.301866	3301	Sun	B3KTP7;P39059	81.4673
COL18A1	D3DSM5;P39060;D3DSM4	rs2274809	21	46906711	G	A	0.166	0.022	1.97e-14	0.645	6861	Yao	D3DSM5;P39060;D3DSM4	56.9339
COL6A1	P12109	rs434206	21	47366802	T	G	-0.2117	0.0253	5.2e-17	0.59389	3301	Sun	P12109	70.0165
COLEC12	Q5KU26	rs2846667	18	466810	G	T	0.202	0.0296	9.3e-12	0.745476	3301	Sun	Q5KU26	46.5714
CP	A5PL27;P00450	rs34004251	3	148929951	T	A	-0.263	0.025	4.91e-25	0.812	6861	Yao	A5PL27;P00450	110.67
CPA4	Q9UI42;A4D1M3	rs34587586	7	129938598	T	G	-1.1658	0.0154	1e-200	0.392741	3301	Sun	Q9UI42;A4D1M3	5730.69
CPB1	P15086	rs13318853	3	148562399	A	G	0.2563	0.0293	2e-18	0.23152	3301	Sun	P15086	76.5177
CPB2	A0A087WSY5;Q96IY4	rs3742264	13	46648094	T	C	0.849	0.0398274	2.806e-83	0.320603	995	Suhre	A0A087WSY5;Q96IY4	454.413
CPM	P14384	rs1908671	12	69433404	C	G	-0.1859	0.0272	8.1e-12	0.292111	3301	Sun	P14384	46.7112
CPNE1	B0QZ18;Q99829	rs12481228	20	34218673	C	G	-0.977	0.0379	1.8e-146	0.097658	3301	Sun	B0QZ18;Q99829	664.524
CPXM1	Q96SM3	rs67159741	20	2780762	G	GCGCGCGCGTGCACTGTGTGTGCGCGCA	-0.6434	0.0402	1e-57	0.100249	3301	Sun	Q96SM3	256.159
CPZ	Q66K79	rs2631738	4	8479754	G	A	0.1949	0.0243	1e-15	0.519366	3301	Sun	Q66K79	64.3296
CREB3L4	Q8TEY5	rs4845586	1	153942597	G	T	0.2556	0.0248	7.1e-25	0.46994	3301	Sun	Q8TEY5	106.223
CREG1	O75629	rs7513428	1	167515272	C	T	-0.3111	0.0334	1.4e-20	0.836173	3301	Sun	O75629	86.7575
CRELD1	Q96HD1;A0A024R2G1	rs7627326	3	9981734	T	G	-1.0936	0.0217	1e-200	0.23988	3301	Sun	Q96HD1;A0A024R2G1	2539.79
CRISP2	A0A024RD74;P16562	rs478328	6	49720877	G	A	0.5695	0.0227	4.2e-139	0.454081	3301	Sun	A0A024RD74;P16562	629.413
CRISPLD2	A0A140VK80;Q9H0B8	rs12921670	16	84838761	A	G	0.2615	0.0294	5.4e-19	0.256992	3301	Sun	A0A140VK80;Q9H0B8	79.1132
CRP	P02741	rs2211320	1	159693605	G	A	0.149	0.02	4.77e-14	0.677	6861	Yao	P02741	55.5025
CSF1	A0A024R0A1;P09603	rs17610659	1	110503296	T	C	0.15	0.0242805	6.5e-10	0.48	3394	Folkersen	A0A024R0A1;P09603	38.1652
CSF2RB	P32927;Q6NSJ8	rs1534881	22	37329448	A	G	-0.3158	0.0244	2.6e-38	0.445804	3301	Sun	P32927;Q6NSJ8	167.511
CSGALNACT2	A0A0S2Z5K4;Q8N6G5;A0A0S2Z5F9;A0A0S2Z5F5	rs2435349	10	43643466	G	A	-0.1961	0.0278	1.6e-12	0.272811	3301	Sun	A0A0S2Z5K4;Q8N6G5;A0A0S2Z5F9;A0A0S2Z5F5	49.7583
CST1	P01037	rs6114248	20	23711882	A	G	0.564	0.0425541	5.048e-37	0.314573	995	Suhre	P01037	175.661
CST2	P09228	rs6114248	20	23711882	A	G	0.5148	0.0428873	4.39e-31	0.314573	995	Suhre	P09228	144.085
CST3	A0A0K0K1J1;P01034	rs911119	20	23612737	T	C	0.393	0.022	6.66e-73	0.779	6861	Yao	A0A0K0K1J1;P01034	319.11
CST5	P28325	rs6138152	20	23850130	G	A	0.7176	0.0500711	1.76e-42	0.195587	997	Suhre	P28325	205.396
CST6	Q15828	rs3825068	11	65768093	G	A	0.5965	0.0757	3.2e-15	0.027795	3301	Sun	Q15828	62.0911
CST7	O76096	rs6138458	20	24973769	A	G	-0.7626	0.0469193	7.603e-53	0.227182	997	Suhre	O76096	264.174
CTRB1	P17538	rs8051363	16	75255217	G	A	0.6471	0.0242	1.6e-157	0.704343	3301	Sun	P17538	715.01
CTSB	Q5HYG5;A0A024R374;P07858;B4DMY4	rs1692819	8	11705448	A	G	0.4246	0.0274	5.2e-54	0.291825	3301	Sun	Q5HYG5;A0A024R374;P07858;B4DMY4	240.137
CTSD	P07339;V9HWI3	rs111693235	11	1770224	C	G	0.35	0.0329033	2e-26	0.71	3394	Folkersen	P07339;V9HWI3	113.151
CTSF	Q9UBX1	rs1791679	11	66337874	A	C	0.2349	0.0269	2.5e-18	0.289477	3301	Sun	Q9UBX1	76.2538
CTSH	P09668	rs34593439	15	79234957	A	G	-1.147	0.0346	1e-200	0.110656	3301	Sun	P09668	1098.94
CTSS	P25774	rs41271951	1	150737220	G	A	-0.8605	0.0419	7.1e-94	0.08349	3301	Sun	P25774	421.768
CXCL11	O14625	rs10031452	4	76924933	C	T	-0.2328	0.0245	2.4e-21	0.528726	3301	Sun	O14625	90.2888
CXCL16	Q9H2A7	rs144830084	17	4618101	T	A	-0.2245	0.0281	1.4e-15	0.255651	3301	Sun	Q9H2A7	63.8293
CXCL6	P80162	rs16850073	4	74703999	T	C	0.8877	0.0376405	9.66e-98	0.376524	984	Suhre	P80162	556.189
DCBLD2	Q96PD2	rs9864010	3	98678173	A	G	-0.6199	0.0536	6.6e-31	0.054612	3301	Sun	Q96PD2	133.756
DEFB1	P60022	rs2738176	8	6738228	A	T	-0.3893	0.0249	5.6e-55	0.365039	3301	Sun	P60022	244.439
DEFB104A	Q8WTQ1	rs183772362	8	7243016	T	C	0.5043	0.0718	2.1e-12	0.032572	3301	Sun	Q8WTQ1	49.332
DKK1	I1W660;O94907	rs1194673	10	54141652	A	G	0.1824	0.0261	2.8e-12	0.632462	3301	Sun	I1W660;O94907	48.8392
DKK3	Q9UBP4;F6SYF8	rs11022114	11	12038874	A	G	0.3364	0.0269	6.5e-36	0.327961	3301	Sun	Q9UBP4;F6SYF8	156.389
DLK1	A8K019;P80370;A0A024R6L1	rs12881760	14	101176335	C	G	0.5356	0.0251	3.5e-101	0.676353	3301	Sun	A8K019;P80370;A0A024R6L1	455.338
DLL1	O00548	rs959025	6	170588654	T	C	0.1911	0.0248	1.3e-14	0.415638	3301	Sun	O00548	59.377
DNAJC30	B3KSU4;Q96LL9	rs73702564	7	73084816	T	C	0.7183	0.0622	6.9e-31	0.038602	3301	Sun	B3KSU4;Q96LL9	133.362
DPP7	Q9UHL4	rs10747049	9	140008750	C	G	0.3641	0.0277	2.3e-39	0.749544	3301	Sun	Q9UHL4	172.775
DPT	Q07507	rs1018454	1	168697761	C	A	0.4155	0.0241	7.8e-67	0.585888	3301	Sun	Q07507	297.24
DSC2	Q02487	rs1789063	18	28673913	A	T	-0.2159	0.0293	1.8e-13	0.768825	3301	Sun	Q02487	54.2963
DSG2	Q14126	rs2704050	18	29095888	G	A	-0.1687	0.0248	9.3e-12	0.49311	3301	Sun	Q14126	46.2729
DUSP13	Q6B8I1;A0A024QZR6;Q9UII6;U3KQ82	rs6480771	10	76861680	C	T	-0.2994	0.0247	8.3e-34	0.415141	3301	Sun	Q6B8I1;A0A024QZR6;Q9UII6;U3KQ82	146.93
ECM1	Q16610;A0A140VJI7	rs13294	1	150484987	A	G	-0.8493	0.0351359	7.727e-102	0.39759	996	Suhre	Q16610;A0A140VJI7	584.28
EDAR	Q9UNE0	rs6750059	2	109611097	C	T	-0.44	0.0490052	1.343e-18	0.248996	996	Suhre	Q9UNE0	80.6158
EFEMP1	A0A0S2Z4F1;B2R6M6;Q12805;A0A0S2Z3V1	rs3791679	2	56096892	A	G	-0.226	0.021	2.49e-26	0.761	6861	Yao	A0A0S2Z4F1;B2R6M6;Q12805;A0A0S2Z3V1	115.819
EGF	P01133	rs11568972	4	110889007	C	A	0.2654	0.0256	3.1e-25	0.336807	3301	Sun	P01133	107.479
EMILIN3	Q9NT22	rs61739314	20	39990377	C	G	-0.6855	0.0691	3.6e-23	0.033292	3301	Sun	Q9NT22	98.4144
ENPP5	Q9UJA9;B4DHN2	rs1047153	6	46128745	T	C	-0.7891	0.0214	1e-200	0.646395	3301	Sun	Q9UJA9;B4DHN2	1359.68
ENPP7	Q6UWV6	rs11871061	17	77706544	C	T	0.9867	0.02	1e-200	0.359387	3301	Sun	Q6UWV6	2433.94
ENTPD1	P49961	rs11188501	10	97600919	A	G	0.2147	0.0262	2.2e-16	0.339852	3301	Sun	P49961	67.1524
ENTPD5	A0A024R6D3;O75356;A0A024R6B4;G3V4I0	rs57731447	14	74487521	A	G	-0.9668	0.0489	7.8e-87	0.05877	3301	Sun	A0A024R6D3;O75356;A0A024R6B4;G3V4I0	390.891
EPHB2	B4DSE0;Q4LE53;Q6NVW1;P29323	rs6687487	1	23061551	A	G	-0.6122	0.0447	1.3e-42	0.080316	3301	Sun	B4DSE0;Q4LE53;Q6NVW1;P29323	187.574
ERAP1	Q9NZ08	rs17482078	5	96118866	T	C	-0.9615	0.0251	1e-200	0.216313	3301	Sun	Q9NZ08	1467.41
ERAP2	B2R769;Q6P179	rs2927608	5	96252432	A	G	1.0523	0.0168	1e-200	0.437292	3301	Sun	B2R769;Q6P179	3923.38
ERLEC1	Q96DZ1;V9HWD3	rs58359565	2	53958919	A	C	-0.2076	0.0295	2.1e-12	0.218741	3301	Sun	Q96DZ1;V9HWD3	49.5234
ERO1B	Q86YB8	rs1254194	1	236399442	T	G	-0.3822	0.0241	1.9e-56	0.595759	3301	Sun	Q86YB8	251.505
ESAM	Q96AP7	rs11219769	11	124620147	T	G	-0.2351	0.0279	3.6e-17	0.264058	3301	Sun	Q96AP7	71.0063
ESD	A0A140VJJ2;P10768	rs8192888	13	47362384	C	G	-0.8063	0.0404	9.8e-89	0.093911	3301	Sun	A0A140VJJ2;P10768	398.319
EVA1C	P58658;B3KWG0	rs6517101	21	33868483	G	T	0.1792	0.026	5.9e-12	0.331469	3301	Sun	P58658;B3KWG0	47.5039
F10	P00742;Q5JVE7;Q5JVE8	rs547138	13	113792170	A	T	0.2581	0.0268	5.8e-22	0.614611	3301	Sun	P00742;Q5JVE7;Q5JVE8	92.7484
F11	P03951	rs2289252	4	187207381	T	C	0.4419	0.0415734	4.6e-25	0.412714	991	Suhre	P03951	112.984
F7	P08709;B4DPM2;F5H8B0	rs776905	13	113781942	C	A	-1.104	0.0603047	9.164e-65	0.112838	997	Suhre	P08709;B4DPM2;F5H8B0	335.148
FABP1	P07148;Q05CP7;Q6FGL7	rs2241883	2	88424066	C	T	-0.1905	0.0272	2.4e-12	0.30311	3301	Sun	P07148;Q05CP7;Q6FGL7	49.0515
FAH	P16930	rs11555096	15	80472526	T	C	-1.8824	0.0803	1.9e-121	0.021281	3301	Sun	P16930	549.532
FAM151A	Q8WW52	rs11206397	1	55097068	T	A	0.2651	0.0261	2.6e-24	0.326689	3301	Sun	Q8WW52	103.166
FAM171B	Q6P995	rs10931256	2	187685195	C	T	-0.3336	0.0295	1.1e-29	0.216165	3301	Sun	Q6P995	127.882
FAM20A	B7Z4Y3;Q8IYA5;Q96MK3;L8B8N7	rs929477	17	66655816	A	G	-0.3717	0.0417	5.1e-19	0.093705	3301	Sun	B7Z4Y3;Q8IYA5;Q96MK3;L8B8N7	79.4535
FAM213A	Q9BRX8	rs10887868	10	82194264	A	G	-0.1879	0.025	5.5e-14	0.412045	3301	Sun	Q9BRX8	56.4903
FAM3B	P58499	rs73226194	21	42721869	T	C	-1.1495	0.0614	3.9e-78	0.039928	3301	Sun	P58499	350.495
FAM3D	A0A0A8K9B4;Q96BQ1	rs3749290	3	58652292	T	G	-0.481	0.0413	2e-31	0.09578	3301	Sun	A0A0A8K9B4;Q96BQ1	135.641
FCER2	K3W4U1;P06734	rs12973524	19	7758263	A	G	-0.3062	0.0245	5.8e-36	0.484028	3301	Sun	K3W4U1;P06734	156.199
FCGR2B	P31994;P31995	rs6665610	1	161641384	A	G	1.3308	0.0224	1e-200	0.204529	3301	Sun	P31994;P31995	3529.63
FCGR3B	O75015;M9MML6;A0A087WZR4;A0A087WU90	rs10919543	1	161508617	G	A	0.4353	0.0251	3.2e-67	0.324432	3301	Sun	O75015;M9MML6;A0A087WZR4;A0A087WU90	300.767
FCN1	O00602	rs11103602	9	137854872	A	G	0.5827	0.0266	1.5e-106	0.258023	3301	Sun	O00602	479.873
FCN2	Q15485	rs57136797	9	137752540	T	A	-0.6346	0.0353	3.7e-72	0.163996	3301	Sun	Q15485	323.185
FCRL1	Q96LA6	rs4971155	1	157779182	A	T	-0.2557	0.0243	6.3e-26	0.506233	3301	Sun	Q96LA6	110.726
FCRL3	Q96P31	rs7528684	1	157670816	G	A	0.5253	0.0233	1.4e-112	0.465109	3301	Sun	Q96P31	508.28
FCRL4	Q96PJ5	rs11582663	1	157559122	T	C	-1.1329	0.0295	1e-200	0.144281	3301	Sun	Q96PJ5	1474.82
FCRL6	Q6DN72	rs58240276	1	159783559	T	C	-0.6094	0.0299	3.1e-92	0.190167	3301	Sun	Q6DN72	415.396
FETUB	Q9UGM5;E9PG08;Q5J875;B7Z8T3	rs3733159	3	186360409	G	T	0.2662	0.0435781	1.433e-09	0.312437	997	Suhre	Q9UGM5;E9PG08;Q5J875;B7Z8T3	37.3146
FGF2	P09038	rs308403	4	123757748	T	C	-0.5896	0.0432144	5.796e-39	0.319277	996	Suhre	P09038	186.148
FLRT2	O43155	rs17796777	14	85806774	C	A	-0.2353	0.0276	1.5e-17	0.285507	3301	Sun	O43155	72.6818
FLRT3	Q9NZU0	rs11908097	20	14689146	C	T	0.4444	0.0278	2.5e-57	0.25127	3301	Sun	Q9NZU0	255.54
FLT4	P35916	rs34221241	5	180057293	C	T	-0.363	0.0401	1.5e-19	0.104286	3301	Sun	P35916	81.9454
FN1	B7ZLE5;P02751;Q6MZM7;Q9UQS6;Q6MZF4;Q6N084	rs1250258	2	216300185	C	T	-0.7113	0.0453897	1.282e-49	0.254518	996	Suhre	B7ZLE5;P02751;Q6MZM7;Q9UQS6;Q6MZF4;Q6N084	245.578
FRZB	D9ZGF6;Q92765	rs288326	2	183703336	A	G	0.5655	0.0362	3.7e-55	0.12625	3301	Sun	D9ZGF6;Q92765	244.033
FSTL1	Q12841	rs1147707	3	120169248	T	C	-0.2113	0.0255	1.1e-16	0.389098	3301	Sun	Q12841	68.6623
FUT10	Q6P4F1	rs2732317	8	33330687	C	A	-0.4501	0.0242	2.5e-77	0.61158	3301	Sun	Q6P4F1	345.929
FUT3	A8K737;P21217	rs708686	19	5840619	T	C	-0.853	0.0242	1e-200	0.274027	3301	Sun	A8K737;P21217	1242.42
FUT5	K7ENC0;Q11128	rs778809	19	5830302	A	G	-0.58	0.025	1.3e-118	0.301394	3301	Sun	K7ENC0;Q11128	538.24
FUT8	Q546E0;Q9BYC5;A8K8P8	rs2127870	14	65796846	C	G	-1.049	0.0246	1e-200	0.784568	3301	Sun	Q546E0;Q9BYC5;A8K8P8	1818.36
GALP	Q9UBC7	rs111265125	19	56688781	C	G	0.6468	0.0907	1e-12	0.021819	3301	Sun	Q9UBC7	50.854
GFRA1	P56159;B7Z856	rs10885877	10	117966090	G	C	0.2645	0.0272	2e-22	0.295454	3301	Sun	P56159;B7Z856	94.5613
GFRA2	O00451	rs15881	8	21550768	C	A	0.2954	0.0246	4.1e-33	0.455607	3301	Sun	O00451	144.195
GFRAL	Q6UXV0	rs72975088	6	55535375	T	A	0.2467	0.0348	1.3e-12	0.1485	3301	Sun	Q6UXV0	50.2551
GGH	Q92820	rs10957266	8	63923764	C	T	0.7985	0.0456	1.2e-68	0.071297	3301	Sun	Q92820	306.634
GHR	P10912;A0A087X0H5;A0A087X162	rs150036324	5	42738222	C	A	0.1787	0.0263	1e-11	0.594074	3301	Sun	P10912;A0A087X0H5;A0A087X162	46.1676
GLCE	O94923	rs11854180	15	69559340	T	G	0.8286	0.0248	1e-200	0.769146	3301	Sun	O94923	1116.31
GLRX2	Q9NS18	rs148212596	1	193074511	G	A	1.1837	0.0881	3.5e-41	0.019804	3301	Sun	Q9NS18	180.523
GLTPD2	A6NH11	rs34460487	17	4685228	A	G	0.2669	0.0259	6.8e-25	0.346378	3301	Sun	A6NH11	106.193
GNLY	B4E3H9;P22749	rs12151621	2	85934499	A	C	0.7736	0.0264	7.4e-189	0.227041	3301	Sun	B4E3H9;P22749	858.668
GNRH2	O43555	rs3787480	20	3016895	A	G	-0.2403	0.0342	2.3e-12	0.148627	3301	Sun	O43555	49.3691
GP1BA	L7UYB8;P07359	rs72835078	17	4826592	T	G	0.3281	0.0481	9.1e-12	0.071969	3301	Sun	L7UYB8;P07359	46.5288
GP5	P40197	rs1466733	3	194120998	A	G	0.171	0.021	8.6e-17	0.737	6861	Yao	P40197	66.3061
GP6	Q9HCN6	rs1654439	19	55553647	T	G	-0.6565	0.0548756	6.59e-31	0.170181	996	Suhre	Q9HCN6	143.123
GPC1	P35052;H7C410	rs4074478	2	241446340	T	C	0.4237	0.0409	4.3e-25	0.106437	3301	Sun	P35052;H7C410	107.317
GPC5	P78333	rs2147190	13	92058888	T	C	0.3335	0.0448565	2.267e-13	0.336355	993	Suhre	P78333	55.2766
GPC5	P78333	rs342702	13	92422946	T	G	-0.8042	0.0247	1e-200	0.274008	3301	Sun	P78333	1060.07
GPNMB	Q14956;A0A024RA55;Q96F58	rs2268748	7	23313171	C	T	0.6868	0.0619	1.2e-28	0.0406	3301	Sun	Q14956;A0A024RA55;Q96F58	123.106
GPX7	Q96SL4	rs1097234	1	53063559	A	C	0.5633	0.0311	1.6e-73	0.174745	3301	Sun	Q96SL4	328.064
GRAMD1C	Q8IYS0;B3KUR5	rs61077924	3	113625933	G	C	0.6198	0.0239	3.4e-148	0.324013	3301	Sun	Q8IYS0;B3KUR5	672.523
GRN	P28799	rs5848	17	42430244	T	C	-0.2763	0.0281	8.1e-23	0.28735	3301	Sun	P28799	96.6828
GSTA1	A0A140VJK4;P08263;B7Z1F9	rs2290758	6	52662153	A	G	0.4157	0.0237	7.2e-69	0.570024	3301	Sun	A0A140VJK4;P08263;B7Z1F9	307.655
GSTO1	P78417;V9HWG9	rs2282326	10	106020398	C	A	-0.9108	0.0204	1e-200	0.353535	3301	Sun	P78417;V9HWG9	1993.36
GSTP1	P09211;V9HWE9	rs1695	11	67352689	G	A	-0.1781	0.0254	2.3e-12	0.34538	3301	Sun	P09211;V9HWE9	49.1655
GZMM	P51124	rs16989724	19	531115	T	C	0.4303	0.0529	3.9e-16	0.935134	3301	Sun	P51124	66.1655
H6PD	R4GMU1;O95479	rs34603401	1	9305445	C	A	0.7589	0.0317	1e-126	0.150217	3301	Sun	R4GMU1;O95479	573.127
HAVCR2	Q8TDQ0	rs6874178	5	156530149	T	A	-0.734	0.0286	1e-145	0.817181	3301	Sun	Q8TDQ0	658.658
HBZ	P02008	rs2461286	16	203254	G	A	-0.8846	0.0209	1e-200	0.646861	3301	Sun	P02008	1791.44
HDHD2	Q9H0R4;V9HW73	rs75228657	18	44741063	G	A	0.7021	0.0544	4.7e-38	0.052264	3301	Sun	Q9H0R4;V9HW73	166.571
HGFAC	D6RAR4;Q04756	rs1203119	4	3406952	A	G	-0.9854	0.0759241	1.095e-35	0.0824121	995	Suhre	D6RAR4;Q04756	168.448
HP	P00738;Q6PEJ8;A0A0C4DGL8	rs217184	16	72105965	C	T	0.8688	0.0277	1e-200	0.195652	3301	Sun	P00738;Q6PEJ8;A0A0C4DGL8	983.739
HPGDS	O60760	rs1965049	4	95266204	G	A	0.4396	0.0246	1.3e-71	0.620956	3301	Sun	O60760	319.334
HPX	P02790;Q9BS19	rs7935957	11	6450200	A	T	-0.252	0.022	5.06e-30	0.788	6861	Yao	P02790;Q9BS19	131.207
HS6ST1	O60243	rs34827544	2	129084425	T	C	-0.3048	0.0348	1.9e-18	0.157293	3301	Sun	O60243	76.7134
HSP90B1	P14625;V9HWP2	rs1165693	12	104340204	A	G	1.0974	0.0182	1e-200	0.321367	3301	Sun	P14625;V9HWP2	3635.69
HSPB1	P04792;V9HW43	rs13236526	7	75913642	A	G	0.36	0.0420415	1.1e-17	0.7	3394	Folkersen	P04792;V9HW43	73.3244
ICAM1	P05362	rs5498	19	10395683	G	A	-1.1988	0.0136	1e-200	0.430506	3301	Sun	P05362	7769.9
ICAM5	Q8N6I2;Q9UMF0	rs281439	19	10400110	C	G	0.8918	0.0258	1e-200	0.7804	3301	Sun	Q8N6I2;Q9UMF0	1194.8
ICOSLG	O75144;B7Z1W8;A0N0L8	rs11558819	21	45656774	T	C	-0.5762	0.0261	3.5e-108	0.268737	3301	Sun	O75144;B7Z1W8;A0N0L8	487.378
IDO1	P14902	rs7010461	8	39781444	T	C	0.25	0.0271	2.5e-20	0.333882	3301	Sun	P14902	85.1023
IDUA	P35475	rs3822020	4	985727	G	A	0.608	0.0235	7.2e-148	0.636581	3301	Sun	P35475	669.378
IFI16	Q16666	rs72709516	1	159004851	T	C	0.8518	0.0577	2.6e-49	0.04404	3301	Sun	Q16666	217.933
IFNAR1	P17181	rs2257167	21	34715699	C	G	-0.2897	0.0363	1.4e-15	0.13427	3301	Sun	P17181	63.6918
IGF2R	P11717	rs629849	6	160494409	G	A	0.8992	0.0331	9.5e-163	0.870653	3301	Sun	P11717	738
IGFBP7	Q16270	rs1718849	4	57942323	C	T	-0.3626	0.0281	5.2e-38	0.766286	3301	Sun	Q16270	166.511
IGFLR1	K7EL86;Q9H665	rs12459634	19	36230174	C	T	-0.7007	0.033	5.8e-100	0.144789	3301	Sun	K7EL86;Q9H665	450.854
IGLL1	P15814	rs139571703	22	23915620	T	C	-0.7264	0.0693	9.8e-26	0.037383	3301	Sun	P15814	109.872
IL11RA	Q14626;Q5VZ79	rs11575578	9	34656479	A	G	0.5065	0.0479	4.4e-26	0.068486	3301	Sun	Q14626;Q5VZ79	111.812
IL12B	P29460	rs4921484	5	158769753	C	T	0.3123	0.0262	7.2e-33	0.678009	3301	Sun	P29460	142.083
IL12RB2	B4DGA4;Q99665;A0A0A0MTN7;B7ZB60	rs12566098	1	67889571	G	C	0.2568	0.0267	6e-22	0.688055	3301	Sun	B4DGA4;Q99665;A0A0A0MTN7;B7ZB60	92.5055
IL15RA	Q13261;A0A0A0MS77;G8CVM3	rs8177641	10	6016892	G	A	0.5091	0.0251	1.7e-91	0.317813	3301	Sun	Q13261;A0A0A0MS77;G8CVM3	411.395
IL16	Q14005;Q9UME6	rs4778639	15	81600451	G	T	-0.6805	0.042	4.5e-59	0.09142	3301	Sun	Q14005;Q9UME6	262.517
IL17RA	Q96F46	rs3827278	22	17595915	A	C	0.975	0.0425997	1.969e-93	0.231695	997	Suhre	Q96F46	523.838
IL17RB	Q9NRM6	rs2232346	3	53892830	C	T	1.1818	0.0636	3.5e-77	0.036587	3301	Sun	Q9NRM6	345.282
IL17RD	Q8NFM7;B4DXM5	rs6776722	3	57142659	A	G	-0.4623	0.0254	3.4e-74	0.695339	3301	Sun	Q8NFM7;B4DXM5	331.269
IL18	A0A024R3E0;Q14116	rs75649625	11	112052194	G	A	0.29	0.0303917	1.4e-21	0.76	3394	Folkersen	A0A024R3E0;Q14116	91.0512
IL18R1	Q13478;B7ZKV7	rs1420106	2	103035044	G	A	-0.9085	0.0257	1e-200	0.775551	3301	Sun	Q13478;B7ZKV7	1249.64
IL18RAP	O95256	rs6543140	2	103074274	T	G	0.4854	0.0460236	1.013e-24	0.301308	994	Suhre	O95256	111.234
IL1R2	P27930	rs7561460	2	102617204	C	T	-0.4025	0.0242	6.2e-62	0.395872	3301	Sun	P27930	276.631
IL1RAP	A8K6K4;Q9NPH3	rs6444442	3	190346060	G	A	-1.352	0.0246	1e-200	0.841013	3301	Sun	A8K6K4;Q9NPH3	3020.53
IL1RL2	Q9HB29	rs2228139	2	102781649	G	C	-0.4249	0.0484	1.6e-18	0.069221	3301	Sun	Q9HB29	77.0695
IL1RN	P18510;A0A024R528	rs6761276	2	113832312	C	T	-0.1907	0.0248	1.5e-14	0.577697	3301	Sun	P18510;A0A024R528	59.1287
IL23R	Q5VWK5	rs11581607	1	67707690	A	G	-0.42	0.0491	1.2e-17	0.066948	3301	Sun	Q5VWK5	73.1704
IL27RA	Q6UWB1	rs35026308	19	14153293	C	T	-0.9457	0.0286	1e-200	0.176436	3301	Sun	Q6UWB1	1093.39
IL5RA	A0A024R2C8;Q01344;Q8NHV7	rs77400868	3	3150964	G	A	0.5096	0.0362	6.8e-45	0.13908	3301	Sun	A0A024R2C8;Q01344;Q8NHV7	198.172
IL6ST	A0A0A0N0L2;P40189;Q17RA0	rs11574765	5	55278967	G	A	0.3809	0.0388	1e-22	0.115654	3301	Sun	A0A0A0N0L2;P40189;Q17RA0	96.3737
IL7R	P16871	rs11957503	5	35883176	G	T	0.4248	0.0436443	1.922e-21	0.437249	996	Suhre	P16871	94.7357
ISG15	P05161	rs1891906	1	950243	C	A	0.2592	0.0253	1.4e-24	0.385856	3301	Sun	P05161	104.961
ISLR2	Q6UXK2	rs2959011	15	74611781	T	A	0.198	0.0261	3.2e-14	0.34226	3301	Sun	Q6UXK2	57.5505
ITIH5	G5E9D8;Q86UX2;Q96JW9;C9J2H1;A0A096LP62	rs7909223	10	7700709	G	A	0.3222	0.0286	2e-29	0.747691	3301	Sun	G5E9D8;Q86UX2;Q96JW9;C9J2H1;A0A096LP62	126.917
KDELC2	A0A024R3C4;Q7Z4H8	rs74911261	11	108357137	A	G	-1.3136	0.0745	1.1e-69	0.026545	3301	Sun	A0A024R3C4;Q7Z4H8	310.895
KDR	A0A024RD88;P35968	rs34231037	4	55972946	G	A	-1.1531	0.0649	1e-70	0.033769	3301	Sun	A0A024RD88;P35968	315.678
KIAA1161	Q6NSJ0	rs10972076	9	34356359	T	C	0.3082	0.0252	2.2e-34	0.624659	3301	Sun	Q6NSJ0	149.577
KLK7	P49862;B4DHX9;A0A024R4H6	rs2739419	19	51484562	G	A	0.7031	0.0408	1.1e-66	0.908316	3301	Sun	P49862;B4DHX9;A0A024R4H6	296.971
KLK8	A0A0A0MQY9;O60259	rs74705037	19	51504808	A	G	0.9287	0.0579	6.3e-58	0.044509	3301	Sun	A0A0A0MQY9;O60259	257.273
KNG1	P01042	rs2304456	3	186445052	G	T	-1.366	0.0581784	2.888e-97	0.102912	996	Suhre	P01042	551.288
KYAT3	B4DW13;Q6YP21	rs9787133	1	89382664	G	C	-0.1716	0.0246	2.9e-12	0.493516	3301	Sun	B4DW13;Q6YP21	48.6591
LAMC2	Q13753	rs2276543	1	183155305	A	G	0.6155	0.0251	4.4e-133	0.279009	3301	Sun	Q13753	601.324
LCT	P09848	rs4988235	2	136608646	A	G	0.7759	0.0244	1e-200	0.711217	3301	Sun	P09848	1011.19
LEPR	P48357;Q4G138	rs3790438	1	66085525	A	T	-1.3745	0.0219	1e-200	0.175255	3301	Sun	P48357;Q4G138	3939.14
LGALS2	P05162	rs5756729	22	37961353	T	C	-0.275	0.0259	2.2e-26	0.592511	3301	Sun	P05162	112.737
LGALS3	A0A024R693;P17931	rs9323280	14	55801687	A	C	0.77	0.0463489	5.6e-62	0.87	3394	Folkersen	A0A024R693;P17931	275.996
LHB	A0A0F7RQE6;P01229	rs75287599	19	49517140	T	C	-0.4342	0.0458	2.4e-21	0.077817	3301	Sun	A0A0F7RQE6;P01229	89.877
LILRA4	P59901	rs2241384	19	54849942	A	G	-0.3088	0.0327	3.4e-21	0.170417	3301	Sun	P59901	89.1783
LILRA5	A6NI73	rs759819	19	54815577	C	T	-0.5429	0.0242	2.5e-111	0.330491	3301	Sun	A6NI73	503.279
LILRA6	Q6PI73	rs35361042	19	54748737	G	C	1.3399	0.0376	1e-200	0.091124	3301	Sun	Q6PI73	1269.9
LILRB1	A0A087WSV6;Q8NHL6;A0A087WSX8;D9IDM5;A8MVE2;A0A0B4J1W1	rs2114511	19	55145093	C	G	-1.8056	0.046	1e-200	0.051234	3301	Sun	A0A087WSV6;Q8NHL6;A0A087WSX8;D9IDM5;A8MVE2;A0A0B4J1W1	1540.73
LILRB2	Q8N423	rs386056	19	54782919	T	C	-1.1495	0.0233	1e-200	0.201121	3301	Sun	Q8N423	2433.92
LILRB5	O75023	rs12975366	19	54759361	C	T	-1.1607	0.0152	1e-200	0.405252	3301	Sun	O75023	5831.13
LIPN	Q5VXI9	rs10509554	10	90525792	T	C	1.0165	0.0213	1e-200	0.306794	3301	Sun	Q5VXI9	2277.49
LMAN2L	Q9H0V9;B4DI83;B4E308;B4DVH1	rs2271893	2	97405440	A	G	0.2628	0.026	4.4e-24	0.322912	3301	Sun	Q9H0V9;B4DI83;B4E308;B4DVH1	102.165
LMNB1	B4DZT3;P20700	rs36105360	5	126161690	T	C	0.8039	0.0789	2.2e-24	0.025189	3301	Sun	B4DZT3;P20700	103.813
LPA	P08519	rs55730499	6	161005610	C	T	-1.255	0.046	3.77e-167	0.939	6861	Yao	P08519	744.341
LRIG3	Q6UXM1;C9K080	rs11172791	12	59272973	C	T	-0.4624	0.0613	4.8e-14	0.04525	3301	Sun	Q6UXM1;C9K080	56.9003
LRPAP1	P30533	rs78770234	4	3496683	A	G	-0.6821	0.0688	3.6e-23	0.032618	3301	Sun	P30533	98.2922
LRRC15	Q8TF66;B3KWI4	rs57514363	3	194087927	G	T	0.5927	0.0383	5.9e-54	0.112882	3301	Sun	Q8TF66;B3KWI4	239.482
LRRN1	Q6UXK5;A8K6Q2	rs6801789	3	3807592	C	T	0.246	0.0253	2.3e-22	0.354026	3301	Sun	Q6UXK5;A8K6Q2	94.543
LY9	A0A0C4DFU4;Q9HBG7;Q05CA2;Q0VAI0;Q5VYH9	rs540254	1	160767737	C	T	0.4173	0.0448028	7.783e-20	0.353266	995	Suhre	A0A0C4DFU4;Q9HBG7;Q05CA2;Q0VAI0;Q5VYH9	86.7533
MAN2B2	B7Z754;E9PCD7;Q9Y2E5	rs2301790	4	6600012	G	A	0.3342	0.0238	1e-44	0.483846	3301	Sun	B7Z754;E9PCD7;Q9Y2E5	197.178
MANBA	O00462	rs227370	4	103612043	C	T	-0.5596	0.0248	7.8e-113	0.674618	3301	Sun	O00462	509.157
MANEA	Q5SRI9	rs80268500	6	96009498	C	T	-1.6814	0.0345	1e-200	0.081945	3301	Sun	Q5SRI9	2375.22
MANSC1	Q9H8J5	rs2160588	12	12487447	A	G	0.5024	0.0371	8.7e-42	0.119697	3301	Sun	Q9H8J5	183.38
MANSC4	A6NHS7	rs36138811	12	27927881	C	T	0.6369	0.0277	7.4e-117	0.231771	3301	Sun	A6NHS7	528.668
MAPK13	A0A024RD04;O15264	rs12210904	6	36098191	A	C	0.2538	0.0266	1.5e-21	0.289473	3301	Sun	A0A024RD04;O15264	91.0374
MAPKAPK2	P49137	rs6669284	1	206890435	A	G	0.3261	0.0443227	3.902e-13	0.349398	996	Suhre	P49137	54.1314
MATN4	A2RRP8;B3KQB2;A5D8U1;O95460;A6NNA4	rs11697677	20	43925554	G	A	-0.2298	0.028	2.5e-16	0.253541	3301	Sun	A2RRP8;B3KQB2;A5D8U1;O95460;A6NNA4	67.3572
MBL2	P11226	rs7899547	10	54536839	G	T	0.9477	0.0202	1e-200	0.65277	3301	Sun	P11226	2201.1
MCAM	A0A024R3I5;P43121	rs11217234	11	119177938	A	G	-0.144	0.026	4.32e-08	0.718	6861	Yao	A0A024R3I5;P43121	30.6746
MFAP2	P55001;A0A024RA94	rs4920605	1	17315425	A	G	0.2073	0.0243	1.3e-17	0.553544	3301	Sun	P55001;A0A024RA94	72.7756
MFGE8	Q08431;X6R3G6;B4E396;F5GZN3;B3KTQ2	rs1961839	15	89467454	A	G	-0.2253	0.0252	3.4e-19	0.397423	3301	Sun	Q08431;X6R3G6;B4E396;F5GZN3;B3KTQ2	79.9321
MGAT2	Q10469	rs28396798	14	50075319	T	C	0.1949	0.0244	1.3e-15	0.54747	3301	Sun	Q10469	63.8034
MGAT4B	Q9UQ53	rs73351608	5	179232064	T	A	-0.9586	0.0852	2.2e-29	0.021516	3301	Sun	Q9UQ53	126.589
MGP	A0A024RAX0;P08493	rs7135211	12	15052758	G	A	0.265	0.019	3.62e-44	0.622	6861	Yao	A0A024RAX0;P08493	194.529
MIA	A0A024R0P1;Q16674	rs2604877	19	41275048	C	T	1.4417	0.0424	1e-200	0.068031	3301	Sun	A0A024R0P1;Q16674	1156.16
MMP1	B4DN15;P03956;Q53G95	rs471994	11	102697731	G	A	0.32	0.0257852	2.3e-35	0.65	3394	Folkersen	B4DN15;P03956;Q53G95	154.014
MMP10	P09238	rs17860955	11	102649482	C	T	-0.8693	0.0869	1.4e-23	0.021509	3301	Sun	P09238	100.069
MMP12	P39900	rs28381684	11	102737192	T	A	-0.7789	0.0348	5.1e-111	0.124644	3301	Sun	P39900	500.962
MMP7	P09237	rs11568819	11	102401633	A	G	0.6681	0.0876491	5.837e-14	0.0669014	994	Suhre	P09237	58.1016
MMP8	B4E0I2;P22894	rs35231465	11	102584135	A	G	-0.583	0.061	2.26e-21	0.023	6861	Yao	B4E0I2;P22894	91.3435
MMP9	P14780	rs2250889	20	44642406	C	G	-0.6221	0.0585	2.1e-26	0.953378	3301	Sun	P14780	113.086
MPO	P05164	rs34097845	17	56358429	T	C	-0.5736	0.0497	8.5e-31	0.067304	3301	Sun	P05164	133.2
MRC2	Q9UBG0	rs146385050	17	60637258	A	C	-0.2188	0.0323	1.3e-11	0.195049	3301	Sun	Q9UBG0	45.887
MSMB	P08118	rs10993994	10	51549496	C	T	0.9821	0.0189	1e-200	0.59627	3301	Sun	P08118	2700.15
MTHFS	P49914	rs7173566	15	80211691	C	T	-0.2126	0.0263	6e-16	0.342884	3301	Sun	P49914	65.3454
MTRF1L	Q9UGC7;B4DMX1	rs503366	6	153333550	C	T	0.1652	0.0243	1.1e-11	0.497366	3301	Sun	Q9UGC7;B4DMX1	46.2176
MXRA7	P84157;Q6ZR64	rs9900613	17	74674857	T	C	-0.229	0.0247	1.9e-20	0.430519	3301	Sun	P84157;Q6ZR64	85.9562
NAAA	Q02083	rs9996608	4	76848231	T	C	-0.5485	0.0257	3.9e-101	0.300448	3301	Sun	Q02083	455.499
NAGK	C9JEV6;Q9UJ70	rs7606102	2	71276399	G	A	-0.432	0.0331	6e-39	0.170314	3301	Sun	C9JEV6;Q9UJ70	170.338
NAGPA	Q9UK23	rs12599777	16	5079466	G	A	-0.4178	0.0317	1.4e-39	0.204198	3301	Sun	Q9UK23	173.707
NCAM1	P13591;A0A087WWD4	rs11214489	11	112975934	C	T	0.368	0.024	3.01e-54	0.818	6861	Yao	P13591;A0A087WWD4	235.111
NELL1	B3KXR2;J3KNC5;K9UUD5;Q92832;F5H6I3	rs61652119	11	20955270	A	G	1.1098	0.0553	1.3e-89	0.048674	3301	Sun	B3KXR2;J3KNC5;K9UUD5;Q92832;F5H6I3	402.753
NEO1	Q59FP8;Q92859	rs12903656	15	73326961	C	G	0.2861	0.0415	5.5e-12	0.10075	3301	Sun	Q59FP8;Q92859	47.5269
NFASC	O94856;B4DRH7	rs6667532	1	204948659	G	A	0.8226	0.0387	4.1e-100	0.10515	3301	Sun	O94856;B4DRH7	451.81
NID2	Q14112	rs1151582	14	52482768	T	C	-0.3942	0.0233	2.6e-64	0.456621	3301	Sun	Q14112	286.234
NMRAL1	Q9HBL8	rs11557236	16	4519439	A	G	-0.4905	0.0443	1.5e-28	0.082096	3301	Sun	Q9HBL8	122.594
NOG	Q13253	rs79084672	17	54856140	G	A	1.2369	0.1154	8.7e-27	0.011867	3301	Sun	Q13253	114.883
NOV	A0A024R9J4;P48745	rs58936256	8	120422799	C	T	0.2085	0.0301	4.2e-12	0.215178	3301	Sun	A0A024R9J4;P48745	47.9821
NPPB	P16860	rs198379	1	11915467	T	C	-0.266	0.024	1.58e-41	0.608	6861	Yao	P16860	122.84
NPTX1	Q15818	rs62069681	17	78624702	C	T	0.514	0.0417	7.6e-35	0.09319	3301	Sun	Q15818	151.934
NPW	Q8N729	rs35327014	16	2076202	G	A	-0.4266	0.0288	1.6e-49	0.231175	3301	Sun	Q8N729	219.41
NQO1	P15559;B4DLR8	rs77944668	16	69718112	A	G	-0.7498	0.0283	1.6e-154	0.19326	3301	Sun	P15559;B4DLR8	701.969
NRP1	O14786;Q68DN3;A8K9V7;Q59F20;Q6X907;Q6AWA9	rs2506149	10	33480713	T	C	-0.2805	0.0256	6.9e-28	0.358077	3301	Sun	O14786;Q68DN3;A8K9V7;Q59F20;Q6X907;Q6AWA9	120.057
NRP2	O60462;Q7LBX6;Q7Z3T9;X5D2Q8;A0A024R412;A0A024R3W6	rs16837641	2	206634869	A	G	0.2094	0.0271	1.1e-14	0.321865	3301	Sun	O60462;Q7LBX6;Q7Z3T9;X5D2Q8;A0A024R412;A0A024R3W6	59.7056
NT5C	Q8TCD5;V9HWF3	rs78625720	17	73140941	A	G	-0.7529	0.0719	1.2e-25	0.029536	3301	Sun	Q8TCD5;V9HWF3	109.652
NTN1	O95631	rs72809988	17	8986397	A	G	-0.5788	0.038	1.6e-52	0.110474	3301	Sun	O95631	232.001
NTN4	A8K3H6;B2RE43;Q9HB63	rs17288108	12	96131895	G	A	-0.2779	0.0323	7.2e-18	0.181915	3301	Sun	A8K3H6;B2RE43;Q9HB63	74.0239
NTNG1	Q5IEC3;Q5IEC8;Q9Y2I2;X5DNW2;B4DKF0	rs115668827	1	107678268	C	G	1.0036	0.0565	1.1e-70	0.048772	3301	Sun	Q5IEC3;Q5IEC8;Q9Y2I2;X5DNW2;B4DKF0	315.518
NUDT12	B4E1W3;E7EM93;Q9BQG2	rs74692061	5	102903643	G	A	-0.3756	0.0341	2.8e-28	0.156975	3301	Sun	B4E1W3;E7EM93;Q9BQG2	121.323
NUDT9	Q96KB3;Q9BW91;A0A024RDI6;Q8NG26	rs28696943	4	88310135	G	A	-0.3571	0.0323	2.3e-28	0.166852	3301	Sun	Q96KB3;Q9BW91;A0A024RDI6;Q8NG26	122.229
OAF	Q86UD1	rs117554512	11	120098329	T	C	0.6816	0.0431	2.1e-56	0.086262	3301	Sun	Q86UD1	250.095
OAS1	P00973;F8VXY3	rs4767027	12	113359157	C	T	-0.2701	0.0256	6.2e-26	0.653837	3301	Sun	P00973;F8VXY3	111.319
OBP2B	Q9NPH6	rs4454354	9	136089529	C	T	0.358	0.0298	2.7e-33	0.786126	3301	Sun	Q9NPH6	144.322
ORM1	P02763	rs116994374	9	117084672	G	A	-0.409	0.054	2.55e-14	0.94	6861	Yao	P02763	57.3666
OSMR	Q99650	rs357253	5	38907422	T	C	0.2089	0.0292	8.3e-13	0.231854	3301	Sun	Q99650	51.1813
PAM	P19021;O43832	rs257309	5	102418604	G	A	-0.4664	0.0248	3.8e-79	0.351714	3301	Sun	P19021;O43832	353.683
PATE4	P0C8F1	rs875500	11	125698654	A	T	-0.4819	0.0262	1e-75	0.719869	3301	Sun	P0C8F1	338.307
PCOLCE	Q15113	rs9801017	7	100236202	A	G	0.2113	0.0254	1e-16	0.635533	3301	Sun	Q15113	69.2041
PCOLCE2	Q9UKZ9	rs34516933	3	142603861	A	T	0.422	0.0246	5.4e-66	0.356379	3301	Sun	Q9UKZ9	294.276
PCSK1	P29120	rs6234	5	95728974	C	G	-1.0975	0.0209	1e-200	0.260198	3301	Sun	P29120	2757.51
PDCD1LG2	Q9BQ51	rs16923189	9	5510644	G	A	0.3879	0.0259	7.9e-51	0.297639	3301	Sun	Q9BQ51	224.306
PDCD5	O14737	rs4499344	19	33073431	A	G	0.354	0.0269	1.2e-39	0.291128	3301	Sun	O14737	173.182
PDE5A	O76074;G5E9C5	rs4834770	4	120241849	A	G	-0.314	0.0446174	3.633e-12	0.434171	995	Suhre	O76074;G5E9C5	49.5281
PDGFD	Q9GZP0	rs7950273	11	104031598	G	C	-0.2749	0.0269	1.4e-24	0.287969	3301	Sun	Q9GZP0	104.435
PDGFRB	P09619;Q59F04	rs2304058	5	149508544	G	C	0.9308	0.0203	1e-200	0.556673	3301	Sun	P09619;Q59F04	2102.43
PDIA5	Q14554	rs2278668	3	122835232	C	T	-0.5216	0.0234	4e-110	0.593477	3301	Sun	Q14554	496.871
PEAR1	Q5VY43	rs12137505	1	156883546	G	A	-0.2226	0.0251	8.1e-19	0.406496	3301	Sun	Q5VY43	78.6508
PENK	A0A024R7V4;P01210	rs2670014	8	57376781	T	C	-0.4653	0.0234	1.3e-87	0.473963	3301	Sun	A0A024R7V4;P01210	395.398
PF4V1	P10720	rs941758	4	74718941	A	C	-0.4937	0.0253	6.6e-85	0.708177	3301	Sun	P10720	380.79
PGLYRP1	O75594	rs8102493	19	46530389	C	T	-0.2168	0.0259	5.1e-17	0.333381	3301	Sun	O75594	70.0679
PGM1	B7Z6C2;P36871;B4DDQ8	rs1126728	1	64097432	T	C	0.2869	0.0289	2.8e-23	0.227841	3301	Sun	B7Z6C2;P36871;B4DDQ8	98.552
PI3	P19957	rs16989763	20	43779963	C	T	0.3756	0.0302	1.6e-35	0.195049	3301	Sun	P19957	154.681
PIANP	Q8IYJ0	rs11064321	12	6809896	C	G	0.2262	0.027	5e-17	0.397321	3301	Sun	Q8IYJ0	70.1872
PIGR	P01833	rs2007272	1	207113755	C	G	-0.205	0.0248	1.4e-16	0.425661	3301	Sun	P01833	68.3289
PLA2G2A	A0A024RA96;P14555	rs11573156	1	20306146	C	G	1.0205	0.0243	1e-200	0.231634	3301	Sun	A0A024RA96;P14555	1763.65
PLA2R1	Q13018;B7ZML4	rs3749117	2	160885442	C	T	-0.9021	0.0188	1e-200	0.501272	3301	Sun	Q13018;B7ZML4	2302.47
PLAU	P00749;Q59GZ8;B4DNJ4;A0A024QZM9	rs2227551	10	75669190	T	G	-0.2435	0.0266	5.4e-20	0.716116	3301	Sun	P00749;Q59GZ8;B4DNJ4;A0A024QZM9	83.7982
PLEKHA7	E9PKC0;Q6IQ23	rs382280	11	16857799	T	C	0.2767	0.04	4.8e-12	0.121245	3301	Sun	E9PKC0;Q6IQ23	47.8518
PLG	P00747;Q5TEH5	rs783150	6	161226939	T	C	-0.5174	0.0656689	8.7e-15	0.113568	995	Suhre	P00747;Q5TEH5	62.0773
PLXNB2	O15031	rs28573806	22	50727792	C	T	0.5315	0.0232	3.5e-116	0.399591	3301	Sun	O15031	524.844
PLXNC1	O60486	rs115651556	12	94613898	A	G	-2.1447	0.1008	2.1e-100	0.013723	3301	Sun	O60486	452.702
PLXNC1	O60486	rs7972001	12	94623502	T	C	-1.005	0.122632	7.773e-16	0.0337361	993	Suhre	O60486	67.1621
POFUT1	Q9H488	rs76143353	20	30815755	T	C	-0.8	0.0499	9.3e-58	0.059564	3301	Sun	Q9H488	257.027
POGLUT1	Q8NBL1;B4DJ97	rs75203710	3	119121679	C	T	0.3935	0.0483	3.8e-16	0.070387	3301	Sun	Q8NBL1;B4DJ97	66.3736
POMGNT2	A0A024R2P4;Q8NAT1	rs729654	3	43147652	T	C	-0.2561	0.0239	9.3e-27	0.473213	3301	Sun	A0A024R2P4;Q8NAT1	114.822
PPA1	Q15181;V9HWB5	rs10823500	10	72005190	G	A	0.4013	0.0447665	1.525e-18	0.370854	995	Suhre	Q15181;V9HWB5	80.3584
PPID	E5KN55;Q08752	rs8396	4	159630817	C	T	0.5011	0.0459752	3.395e-26	0.286437	988	Suhre	E5KN55;Q08752	118.796
PPIE	Q9UNP9;B3KSZ1	rs12086750	1	40210468	C	G	-0.3832	0.025	4.8e-53	0.370624	3301	Sun	Q9UNP9;B3KSZ1	234.948
PPIL1	A0A024RCX8;Q9Y3C6	rs12194408	6	36839598	G	C	-1.106	0.0705	1.9e-55	0.030241	3301	Sun	A0A024RCX8;Q9Y3C6	246.112
PPP3CA;PPP3R1	A0A0S2Z4C6;Q08209;A0A0S2Z4B5;P63098	rs17266357	4	102721809	C	T	0.3681	0.0450047	8.67e-16	0.30993	997	Suhre	A0A0S2Z4C6;Q08209;A0A0S2Z4B5;P63098	66.8985
PPT1	P50897	rs7533094	1	40559686	A	G	-0.8621	0.0603	2.3e-46	0.041979	3301	Sun	P50897	204.4
PRCP	B7Z7Q6;P42785;A0A024R5L0	rs2229437	11	82564294	G	T	0.291	0.0315	2.8e-20	0.180887	3301	Sun	B7Z7Q6;P42785;A0A024R5L0	85.3424
PRSS22	Q9GZN4	rs3810801	16	2892370	A	C	0.3066	0.0256	3.7e-33	0.332823	3301	Sun	Q9GZN4	143.438
PRTN3	P24158	rs10425544	19	836043	C	T	0.5991	0.0269	8.3e-110	0.712816	3301	Sun	P24158	496.014
PSAPL1	Q6NUJ1	rs10023470	4	7434456	G	A	0.5481	0.0307	2.6e-71	0.184308	3301	Sun	Q6NUJ1	318.745
PSG3	Q16557	rs2355433	19	43679088	G	A	-0.6523	0.0239	1.6e-163	0.547653	3301	Sun	Q16557	744.902
PSG4	B3KQL2;Q96QL5;Q6P520;Q00888	rs1138888	19	43696022	A	T	-0.666	0.0245	5.4e-163	0.624394	3301	Sun	B3KQL2;Q96QL5;Q6P520;Q00888	738.952
PTGDS	A0A024R8G3;P41222	rs7019538	9	139861470	C	T	0.1979	0.0246	7.8e-16	0.524107	3301	Sun	A0A024R8G3;P41222	64.7174
PTGFRN	Q9P2B2	rs4233450	1	117490261	T	G	1.0007	0.0283	1e-200	0.829141	3301	Sun	Q9P2B2	1250.36
PTHLH	P12272;Q53XY9;A0A024RB29	rs10843115	12	28307717	T	C	0.1862	0.0276	1.4e-11	0.271368	3301	Sun	P12272;Q53XY9;A0A024RB29	45.5136
PTN	A0A024R778;P21246	rs1431093	7	137016297	A	C	0.2196	0.0248	7.9e-19	0.419185	3301	Sun	A0A024R778;P21246	78.4082
QDPR	A0A140VKA9;P09417	rs28719835	4	17520066	T	C	-0.5668	0.0275	1e-94	0.242578	3301	Sun	A0A140VKA9;P09417	424.81
QPCTL	Q9NXS2	rs17850756	19	46206262	A	G	-0.2881	0.026	1.6e-28	0.327901	3301	Sun	Q9NXS2	122.783
QSOX1	A0A140VKE5;O00391;Q13876	rs12371	1	180163390	G	A	0.6995	0.0426	1.3e-60	0.089018	3301	Sun	A0A140VKE5;O00391;Q13876	269.623
QSOX2	Q6ZRP7	rs10858248	9	139108324	G	A	-0.3568	0.0239	1.5e-50	0.502175	3301	Sun	Q6ZRP7	222.871
RARRES1	P49788	rs61696028	3	158455703	C	A	1.3366	0.0266	1e-200	0.146047	3301	Sun	P49788	2524.87
RARRES2	A0A090N7U9;Q99969	rs9640161	7	150045910	A	C	0.3473	0.0417713	3.049e-16	0.370821	987	Suhre	A0A090N7U9;Q99969	69.1279
REG1A	A8K7G6;P05451	rs11126696	2	79323888	G	A	0.265	0.021	2.18e-40	0.612	6861	Yao	A8K7G6;P05451	159.24
REG4	A0A024R0M1;Q9BYZ8	rs79795228	1	120359286	A	C	0.7938	0.0995	1.4e-15	0.015404	3301	Sun	A0A024R0M1;Q9BYZ8	63.6467
RELT	A0A024R5N3;Q969Z4	rs7952686	11	73128503	T	C	0.4125	0.0292	3.1e-45	0.204256	3301	Sun	A0A024R5N3;Q969Z4	199.564
RET	P07949;Q9BTX6;A0A024R7T2	rs2795507	10	43352894	C	T	-0.2768	0.0305	1.1e-19	0.796047	3301	Sun	P07949;Q9BTX6;A0A024R7T2	82.3631
RETN	Q9HD89	rs34124816	19	7733676	C	A	-0.6083	0.0645	4.4e-21	0.037632	3301	Sun	Q9HD89	88.9439
RFESD	Q8TAC1;A0A024RAR3	rs77881626	5	95017852	G	T	-0.5972	0.0573	2.1e-25	0.04763	3301	Sun	Q8TAC1;A0A024RAR3	108.625
RGMA	A0A0A0MTQ4;Q96B86	rs3752102	15	93616014	A	C	-0.2012	0.0245	2.5e-16	0.473455	3301	Sun	A0A0A0MTQ4;Q96B86	67.441
RGMB	J3KNF6;Q6NW40	rs1563317	5	97768486	G	A	0.2161	0.0245	1.2e-18	0.552752	3301	Sun	J3KNF6;Q6NW40	77.7996
RIDA	A0A024R9H2;P52758	rs1462977	8	99115359	G	A	-0.3387	0.0258	2.2e-39	0.322718	3301	Sun	A0A024R9H2;P52758	172.342
RMDN1	Q6N086;Q96DB5;E5RH53	rs11781016	8	87529297	C	A	0.3167	0.0243	8.3e-39	0.489299	3301	Sun	Q6N086;Q96DB5;E5RH53	169.857
RNASE1	P07998;W0UV93	rs17254387	14	21280678	A	G	0.2302	0.0273	3e-17	0.687505	3301	Sun	P07998;W0UV93	71.1026
RNASE2	P10153;W0UV60	rs56204594	14	21433367	C	A	0.2366	0.0244	3.2e-22	0.464292	3301	Sun	P10153;W0UV60	94.0264
RNASE4	P34096;Q53XB4	rs12588573	14	21146584	T	C	-0.4494	0.0291	8.9e-54	0.224438	3301	Sun	P34096;Q53XB4	238.495
RNASE6	Q6IB39;Q93091	rs11622942	14	21250846	T	G	0.9971	0.0236	1e-200	0.233384	3301	Sun	Q6IB39;Q93091	1785.06
ROR1	Q01973	rs1408416	1	64614495	T	G	-0.44	0.033	1.8e-40	0.161988	3301	Sun	Q01973	177.778
RPN1	P04843	rs2712417	3	128345179	G	A	-0.3447	0.0247	3.1e-44	0.618031	3301	Sun	P04843	194.755
RRM2B	Q7LG56	rs74589258	8	103215228	G	A	0.3254	0.0479	1.1e-11	0.07035	3301	Sun	Q7LG56	46.1492
RSPO3	Q9BXY4	rs2489623	6	127455821	C	A	0.27	0.0245	3.6e-28	0.534679	3301	Sun	Q9BXY4	121.449
RTN4R	Q9BZR6	rs75766	22	20174853	A	C	-0.3498	0.0283	4.8e-35	0.748115	3301	Sun	Q9BZR6	152.78
S100A4	P26447	rs58056804	1	153524706	A	G	0.5046	0.0565	4.5e-19	0.049682	3301	Sun	P26447	79.7623
SCARF1	A8K6Z5;Q14162	rs8071756	17	1574342	G	A	0.5897	0.0494265	9.358e-31	0.223671	997	Suhre	A8K6Z5;Q14162	142.345
SCARF2	A0A096LNX8;Q96GP6	rs738086	22	20775556	T	G	0.2997	0.0318	4.8e-21	0.811314	3301	Sun	A0A096LNX8;Q96GP6	88.8217
SCG3	Q8WXD2	rs1378892	15	51964865	C	T	0.486	0.0277	1e-68	0.763554	3301	Sun	Q8WXD2	307.831
SECTM1	Q8WVN6	rs4789763	17	80289284	G	A	0.2805	0.0246	3.8e-30	0.492828	3301	Sun	Q8WVN6	130.016
SELL	A0A024R8Z0;P14151	rs4987358	1	169665551	T	G	-0.5165	0.0261	6.8e-87	0.27377	3301	Sun	A0A024R8Z0;P14151	391.615
SELP	A0A024R8Y9;P16109;Q6NUL9;Q5R341	rs6136	1	169563951	G	T	-0.8073	0.0371	3e-105	0.107874	3301	Sun	A0A024R8Y9;P16109;Q6NUL9;Q5R341	473.502
SEMA3C	B4E2I9;Q99985	rs1019016	7	80570562	T	G	0.1751	0.0248	1.6e-12	0.581376	3301	Sun	B4E2I9;Q99985	49.8504
SEMA3E	O15041	rs3757607	7	83034362	C	G	-1.1204	0.0323	1e-200	0.12244	3301	Sun	O15041	1203.21
SEMA3G	Q9NS98	rs2016575	3	52477080	C	T	-0.2687	0.0316	1.9e-17	0.815652	3301	Sun	Q9NS98	72.3038
SEMA5A	Q13591;X5DR95	rs17329170	5	9547242	A	G	1.432	0.0324	1e-200	0.100634	3301	Sun	Q13591;X5DR95	1953.42
SERPINA1	E9KL23;P01009	rs2749534	14	94809760	G	A	0.4267	0.0537626	5.551e-15	0.201103	997	Suhre	E9KL23;P01009	62.9918
SERPINA3	A0A024R6P0;P01011	rs6575449	14	95097303	T	C	-0.4323	0.0535108	1.903e-15	0.18593	995	Suhre	A0A024R6P0;P01011	65.266
SERPINA4	P29622;A0A024R6I9	rs10135681	14	95007744	C	T	0.2771	0.0422102	8.416e-11	0.395186	997	Suhre	P29622;A0A024R6I9	43.0961
SERPINA4	P29622;A0A024R6I9	rs10139745	14	95035374	A	G	0.6166	0.0277	4.9e-110	0.221432	3301	Sun	P29622;A0A024R6I9	495.504
SERPINE2	A0A024R498;P07093;A0A024R451	rs68066031	2	224880498	C	T	-0.4261	0.0297	1.1e-46	0.258001	3301	Sun	A0A024R498;P07093;A0A024R451	205.831
SERPINF1	A0A140VKF3;P36955	rs62088172	17	1666253	T	C	-0.4449	0.0251	1.8e-70	0.344526	3301	Sun	A0A140VKF3;P36955	314.179
SERPINF2	P08697	rs11657394	17	1636950	A	C	-0.3459	0.0479	5.4e-13	0.077401	3301	Sun	P08697	52.1471
SIGLEC12	Q96PQ1	rs3826667	19	52004074	T	C	-1.127	0.0275	1e-200	0.835439	3301	Sun	Q96PQ1	1679.51
SIGLEC14	Q08ET2	rs1106476	19	52130637	A	T	-1.1918	0.0317	1e-200	0.116912	3301	Sun	Q08ET2	1413.48
SIGLEC6	O43699;A0A024R4K4	rs2124910	19	52025247	T	C	0.653	0.0433631	2.748e-46	0.407351	993	Suhre	O43699;A0A024R4K4	226.77
SIGLEC7	Q9Y286	rs140185670	19	51646140	C	G	-0.6089	0.0482	1.7e-36	0.07999	3301	Sun	Q9Y286	159.587
SIGLEC9	Q9Y336	rs2075803	19	51628529	G	A	-1.2255	0.0123	1e-200	0.55088	3301	Sun	Q9Y336	9926.96
SIRPA	P78324	rs6136377	20	1896288	G	A	-1.2106	0.0153	1e-200	0.368754	3301	Sun	P78324	6260.64
SIRPB1	O00241;Q5TFQ8;H9KV29	rs3848788	20	1543066	A	G	0.7453	0.0239	1e-200	0.304983	3301	Sun	O00241;Q5TFQ8;H9KV29	972.448
SIRPG	Q9P1W8	rs6043409	20	1616206	G	A	0.2628	0.0261	8.1e-24	0.652477	3301	Sun	Q9P1W8	101.384
SLAMF7	Q9NQ25;B4DVL7;B4DW98	rs11581248	1	160720074	T	C	-1.2597	0.0295	1e-200	0.142448	3301	Sun	Q9NQ25;B4DVL7;B4DW98	1823.43
SMOC1	Q9H4F8;A0A024R6E0	rs1958078	14	70354858	C	A	0.3765	0.0328	1.8e-30	0.833946	3301	Sun	Q9H4F8;A0A024R6E0	131.76
SNCA	P37840;H6UYS5	rs2245801	4	90757840	C	T	-0.2507	0.0303	1.2e-16	0.788276	3301	Sun	P37840;H6UYS5	68.4579
SPARCL1	A0A024RDE1;Q14515;B7ZB68;Q8N4S1	rs7681694	4	88462729	A	G	0.5315	0.0244	2.7e-105	0.3366	3301	Sun	A0A024RDE1;Q14515;B7ZB68;Q8N4S1	474.49
SPARCL1	A0A024RDE1;Q14515;B7ZB68;Q8N4S1	rs1462372	4	88478750	C	T	0.3214	0.0461997	6.309e-12	0.327482	997	Suhre	A0A024RDE1;Q14515;B7ZB68;Q8N4S1	48.3964
SPATA20	Q8TB22	rs9890200	17	48624523	C	A	-0.2532	0.0252	8.7e-24	0.375996	3301	Sun	Q8TB22	100.955
SPINK2	D6RI10;D6RC51;P20155;A0A087WTA9;A0A024RD95	rs11941335	4	57689460	T	C	0.9996	0.083	2.2e-33	0.021062	3301	Sun	D6RI10;D6RC51;P20155;A0A087WTA9;A0A024RD95	145.043
SPINK6	Q6UWN8	rs1432688	5	147603178	G	A	1.0579	0.0428	7.6e-135	0.924477	3301	Sun	Q6UWN8	610.944
SPINT2	A0A140VJV6;O43291	rs71354995	19	38791841	G	A	-0.9908	0.0227	1e-200	0.242563	3301	Sun	A0A140VJV6;O43291	1905.11
SPINT3	P49223	rs6017591	20	44141041	C	T	0.5431	0.0227	6e-127	0.541306	3301	Sun	P49223	572.411
SPOCK2	Q92563;A0A024QZQ5	rs1245540	10	73849752	T	C	0.2179	0.0243	3.3e-19	0.44884	3301	Sun	Q92563;A0A024QZQ5	80.4085
SPOCK3	Q9BQ16;A0A0A0MTJ2;B4DI52	rs17599599	4	167961738	A	G	0.8477	0.0765	1.5e-28	0.028272	3301	Sun	Q9BQ16;A0A0A0MTJ2;B4DI52	122.79
SPON1	Q9HCB6	rs10832169	11	14066486	A	G	0.3748	0.0239	1.3e-55	0.490547	3301	Sun	Q9HCB6	245.925
ST3GAL1	A0A024R9L6;Q11201	rs9643300	8	134503148	T	C	-0.2571	0.0246	1.4e-25	0.562654	3301	Sun	A0A024R9L6;Q11201	109.228
ST3GAL6	A0A087WXB8;Q9Y274	rs72934623	3	98509705	A	G	-1.8784	0.0447	1e-200	0.053172	3301	Sun	A0A087WXB8;Q9Y274	1765.88
SVEP1	B3KQM1;Q4LDE5;Q5JB40	rs61751937	9	113312231	C	G	1.1854	0.0702	5.2e-64	0.030029	3301	Sun	B3KQM1;Q4LDE5;Q5JB40	285.138
SWAP70	B3KUB9;E7EMB1;Q9UH65	rs415895	11	9769562	G	C	-0.2659	0.0256	3.5e-25	0.649843	3301	Sun	B3KUB9;E7EMB1;Q9UH65	107.884
TAPBPL	Q9BX59	rs2532497	12	6564210	A	G	1.2577	0.0163	1e-200	0.273692	3301	Sun	Q9BX59	5953.59
TCN1	P20061	rs34528912	11	59631535	T	C	-0.7109	0.0624	4.6e-30	0.04157	3301	Sun	P20061	129.792
TCN2	P20062	rs4820885	22	31012756	C	T	-0.7247	0.0212	1e-200	0.549103	3301	Sun	P20062	1168.54
TEK	Q02763;Q59HG2	rs35030851	9	27197486	T	G	0.5573	0.057	1.4e-22	0.046653	3301	Sun	Q02763;Q59HG2	95.5935
TEPSIN	Q96N21;A0A1B0GV70	rs61745945	17	79205421	A	G	-0.8768	0.0986	5.9e-19	0.016358	3301	Sun	Q96N21;A0A1B0GV70	79.0765
TFF1	P04155	rs3761376	21	43787038	A	G	-0.2204	0.0291	3.9e-14	0.241766	3301	Sun	P04155	57.3637
TGFBI	A0A0S2Z4Q2;Q15582	rs13159365	5	135389433	T	C	-0.4461	0.0239	5e-78	0.507136	3301	Sun	A0A0S2Z4Q2;Q15582	348.392
THBS2	P35442	rs73043857	6	169624900	G	A	0.8084	0.0383	6.9e-99	0.102347	3301	Sun	P35442	445.508
THSD1	A0A024R064;B3KTY7;Q9NS62	rs41292808	13	52971517	T	C	0.9059	0.0757	5.5e-33	0.026681	3301	Sun	A0A024R064;B3KTY7;Q9NS62	143.208
TIE1	B4DTW8;P35590	rs2275180	1	43773033	G	A	0.2538	0.0251	4.8e-24	0.623345	3301	Sun	B4DTW8;P35590	102.244
TIMP3	P35625	rs2097326	22	33165020	G	A	0.9307	0.0396733	4.424e-97	0.27873	992	Suhre	P35625	550.329
TIMP4	Q99727	rs454615	3	12077010	C	T	0.4903	0.0318	1.7e-53	0.830831	3301	Sun	Q99727	237.722
TIRAP	A0A024R3M4;P58753	rs111577916	11	126071349	T	G	-0.5707	0.0774	1.6e-13	0.024689	3301	Sun	A0A024R3M4;P58753	54.3668
TLR4;LY96	O00206;Q9Y6Y9	rs4986790	9	120475302	G	A	-0.9019	0.0509	2.8e-70	0.05593	3301	Sun	O00206;Q9Y6Y9	313.965
TMEM132A	Q24JP5	rs11230521	11	60698732	A	G	0.6176	0.0274	2e-112	0.231444	3301	Sun	Q24JP5	508.058
TMEM132C	Q8N3T6	rs11059617	12	128757909	T	A	-0.225	0.0257	2.2e-18	0.335066	3301	Sun	Q8N3T6	76.6476
TMEM190	Q8WZ59	rs4806666	19	55888095	T	C	-0.997	0.0177	1e-200	0.438473	3301	Sun	Q8WZ59	3172.81
TNFAIP6	P98066	rs289828	2	152137181	T	C	-0.5479	0.0237	5.5e-118	0.62173	3301	Sun	P98066	534.449
TNFRSF11A	Q9Y6Q6	rs884205	18	60054857	C	A	-0.2235	0.0292	2e-14	0.756399	3301	Sun	Q9Y6Q6	58.5854
TNFRSF6B	O95407	rs62217798	20	62347189	T	G	-0.224	0.0316	1.4e-12	0.784171	3301	Sun	O95407	50.2484
TNFSF12;TNFSF12-TNFSF13	O43508;Q4ACW9;A0A0A6YY99	rs12941509	17	7448288	G	C	0.3933	0.0266	2.2e-49	0.279301	3301	Sun	O43508;Q4ACW9;A0A0A6YY99	218.617
TPSAB1;TPSB2	P20231;Q15661;A0A140VJT7	rs4984778	16	1297516	C	G	0.5167	0.0463218	2.678e-27	0.284639	996	Suhre	P20231;Q15661;A0A140VJT7	124.425
TPST1	A0A024RDK9;O60507	rs313829	7	65552497	G	A	0.2313	0.0262	1.1e-18	0.688554	3301	Sun	A0A024RDK9;O60507	77.9379
TPST2	A0A024R1G9;O60704	rs2283824	22	26924456	A	G	0.2429	0.0246	6e-23	0.416943	3301	Sun	A0A024R1G9;O60704	97.4956
TREML2	Q5T2D2	rs61998254	6	41166151	G	A	0.6927	0.0352	5e-86	0.126963	3301	Sun	Q5T2D2	387.262
UCMA	A0A067XJP8;Q8WVF2;A0A067XKV3;A0A067XJX6	rs2093847	10	13276534	T	C	-0.5863	0.0382	3.1e-53	0.106703	3301	Sun	A0A067XJP8;Q8WVF2;A0A067XKV3;A0A067XJX6	235.566
UNC5C	A8K385;O95185	rs57091121	4	96444053	T	A	0.2694	0.0259	1.9e-25	0.336919	3301	Sun	A8K385;O95185	108.192
UROS	A0A0S2Z4T8;P10746;A0A0S2Z5C5;Q5T3L8	rs10794029	10	127561568	G	A	-0.2329	0.0311	7.6e-14	0.794492	3301	Sun	A0A0S2Z4T8;P10746;A0A0S2Z5C5;Q5T3L8	56.0813
VEGFA	P15692;A0A024RD33;A0A024RD37;A0A0Y0IMM4;A2A2V4	rs6921438	6	43925607	A	G	-0.7023	0.0215	1e-200	0.496842	3301	Sun	P15692;A0A024RD33;A0A024RD37;A0A0Y0IMM4;A2A2V4	1067.01
VEGFC	P49767	rs41278571	4	177650866	T	C	1.7416	0.1215	1.3e-46	0.010126	3301	Sun	P49767	205.468
VIT	Q6UXI7	rs10490666	2	36932493	T	A	0.3471	0.0264	1.9e-39	0.304408	3301	Sun	Q6UXI7	172.863
VSIR	Q9H7M9	rs10762477	10	73531069	G	A	0.2705	0.0352	1.7e-14	0.14794	3301	Sun	Q9H7M9	59.054
WFIKKN2	C9J6G4;Q8TEU8	rs7225465	17	48916159	A	G	-0.6533	0.0238	9.3e-166	0.68203	3301	Sun	C9J6G4;Q8TEU8	753.479
WISP1	O95388	rs35472615	8	134197537	A	G	0.5113	0.0263	1.7e-84	0.274129	3301	Sun	O95388	377.955
XCL1	P47992	rs4656599	1	168503386	T	C	0.4295	0.0311	2e-43	0.189892	3301	Sun	P47992	190.724
ACE	P12821	rs4344	17	61566724	A	G	-0.583	0.022	8.5e-136	0.499	3200	Emilsson	P12821	702.25
ACHE	P22303	rs4727469	7	100509163	C	T	-0.297	0.023	7.5e-37	0.524	3200	Emilsson	P22303	166.747
ACP6	Q9NPH0	rs2153463	1	147124310	G	T	0.944	0.022	1e-200	0.739	3200	Emilsson	Q9NPH0	1841.19
ADAM12	O43184	rs10794057	10	127729734	T	C	-0.209	0.025	1.2e-16	0.398	3200	Emilsson	O43184	69.8896
ADAM19	Q9H013	rs7728609	5	156935524	C	T	0.246	0.026	1.2e-21	0.675	3200	Emilsson	Q9H013	89.5207
ADAM22	Q9P0K1	rs6966166	7	87455155	T	C	-0.177	0.026	9.8e-12	0.478	3200	Emilsson	Q9P0K1	46.3447
ADH4	P08319	rs1800759	4	100065509	G	T	0.157	0.025	4.1e-10	0.622	3200	Emilsson	P08319	39.4384
ADH5	P11766	rs1453873	4	100022571	C	T	-0.284	0.027	2.5e-25	0.742	3200	Emilsson	P11766	110.639
ADH7	P40394	rs17529509	4	100351436	C	A	0.401	0.048	8e-17	0.927	3200	Emilsson	P40394	69.7921
ADIPOQ	Q15848	rs143257534	3	186551888	C	T	0.425	0.072	3.3e-09	0.974	3200	Emilsson	Q15848	34.8428
AFP	P02771	rs6829551	4	74173715	T	C	0.187	0.031	2.4e-09	0.812	3200	Emilsson	P02771	36.3881
AKR7A2	O43488	rs144376466	1	19600538	C	T	0.436	0.042	1.9e-24	0.912	3200	Emilsson	O43488	107.764
ALPG	P10696	rs10933394	2	233249080	T	C	-0.192	0.026	1e-13	0.642	3200	Emilsson	P10696	54.5325
ALPP	NA	rs12478529	2	233286654	C	T	-0.354	0.028	2.5e-35	0.778	3200	Emilsson	NA	159.842
AMY2B	P19961	rs17014913	1	104105635	A	G	0.433	0.034	3.2e-36	0.839	3200	Emilsson	P19961	162.188
AOC1	P19801	rs10452848	7	150523544	A	G	-0.765	0.021	1e-200	0.498	3200	Emilsson	P19801	1327.04
AP1G2	O75843	rs12897422	14	24033027	G	A	0.268	0.035	1.3e-14	0.858	3200	Emilsson	O75843	58.6318
APOA1	P02647	rs75507001	11	116577694	C	A	0.55	0.061	1.7e-19	0.957	3200	Emilsson	P02647	81.2954
APOBEC3G	Q9HC16	rs738469	22	39510995	A	G	0.245	0.042	4.5e-09	0.903	3200	Emilsson	Q9HC16	34.0278
APOF	Q13790	rs808919	12	56647911	C	G	0.321	0.04	6.9e-16	0.903	3200	Emilsson	Q13790	64.4006
APOH	P02749	rs1801690	17	64208285	C	G	0.552	0.053	6.5e-25	0.943	3200	Emilsson	P02749	108.474
ARHGAP1	Q07960	rs5899	11	46747662	C	T	0.835	0.111	8.4e-14	0.989	3200	Emilsson	Q07960	56.5883
ASIP	P42127	rs62212171	20	32987687	T	C	-0.814	0.037	9.6e-98	0.89	3200	Emilsson	P42127	484
AZU1	P20160	rs351976	19	806673	T	C	0.216	0.027	1.5e-15	0.709	3200	Emilsson	P20160	64
B3GALT6	Q96L58	rs3766186	1	1162435	C	A	0.271	0.041	6.5e-11	0.899	3200	Emilsson	Q96L58	43.6889
B3GLCT	Q6Y288	rs9544399	13	31885907	A	G	0.278	0.031	1.6e-19	0.791	3200	Emilsson	Q6Y288	80.4204
B3GNT8	Q7Z7M8	rs284663	19	41932612	T	C	0.744	0.021	1e-200	0.56	3200	Emilsson	Q7Z7M8	1255.18
B4GALT6	Q9UBX8	rs113222817	18	29216314	T	G	1.143	0.063	8.1e-71	0.965	3200	Emilsson	Q9UBX8	329.163
BCAN	Q96GW7	rs7541549	1	156588439	T	C	0.201	0.029	5.6e-12	0.767	3200	Emilsson	Q96GW7	48.0392
BOC	Q9BWV1	rs73235147	3	112973955	A	T	-0.241	0.032	1.1e-13	0.833	3200	Emilsson	Q9BWV1	56.7197
BPIFA2	Q96DR5	rs141715080	20	31742114	C	T	0.429	0.076	2e-08	0.973	3200	Emilsson	Q96DR5	31.8631
BTD	P43251	rs13100619	3	15549967	A	C	1.431	0.058	4.4e-122	0.962	3200	Emilsson	P43251	608.728
BTNL8	Q6UX41	rs7721375	5	180439650	C	T	0.273	0.024	1.4e-28	0.507	3200	Emilsson	Q6UX41	129.391
C1QL1	O75973	rs9915692	17	43034207	A	G	-0.279	0.023	3.4e-32	0.463	3200	Emilsson	O75973	147.147
C1QTNF3	Q9BXJ4	rs840390	5	34018623	G	A	0.203	0.037	2.8e-08	0.868	3200	Emilsson	Q9BXJ4	30.1015
C1RL	Q9NZP8	rs6488561	12	7246894	G	A	0.27	0.027	5.6e-24	0.695	3200	Emilsson	Q9NZP8	100
C3	P01024	rs163494	19	6724340	C	T	0.264	0.031	3.4e-17	0.805	3200	Emilsson	P01024	72.5245
C4BPA	P04003	rs11120218	1	207278451	G	A	-0.429	0.038	1.5e-28	0.889	3200	Emilsson	P04003	127.452
C5	P01031	rs1035029	9	123742818	A	G	0.182	0.025	2.1e-13	0.611	3200	Emilsson	P01031	52.9984
C9	P02748	rs265721	5	39354069	G	A	-0.375	0.06	5.9e-10	0.959	3200	Emilsson	P02748	39.0625
CA1	P00915	rs2453868	8	86302696	T	C	-0.147	0.025	2.2e-09	0.582	3200	Emilsson	P00915	34.5744
CA8	P35219	rs7009482	8	61195053	G	A	-0.188	0.025	5.9e-14	0.589	3200	Emilsson	P35219	56.5504
CALCOCO2	Q13137	rs550510	17	46926615	G	A	0.19	0.033	1e-08	0.843	3200	Emilsson	Q13137	33.1497
CAPG	P40121	rs143448563	2	85610023	A	G	1.4	0.094	1e-48	0.983	3200	Emilsson	P40121	221.82
CCL27	Q9Y4X3	rs2070074	9	34649442	A	G	0.321	0.041	1e-14	0.907	3200	Emilsson	Q9Y4X3	61.2974
CCL4L1	Q8NHW4	rs2687507	17	34433964	C	T	-0.239	0.029	1.5e-16	0.747	3200	Emilsson	Q8NHW4	67.9203
CD274	Q9NZQ7	rs1411262	9	5459419	C	T	0.31	0.027	1.7e-29	0.736	3200	Emilsson	Q9NZQ7	131.824
CD300A	Q9UGN4	rs2272111	17	72469966	G	A	0.435	0.028	1.2e-52	0.788	3200	Emilsson	Q9UGN4	241.358
CD300E	Q496F6	rs8081669	17	72614611	G	A	0.27	0.025	4.2e-27	0.551	3200	Emilsson	Q496F6	116.64
CD7	P09564	rs116473040	17	80291652	A	G	0.962	0.057	1.3e-61	0.955	3200	Emilsson	P09564	284.84
CD8A	P01732	rs111976570	2	87014112	A	C	-0.567	0.031	7.3e-73	0.81	3200	Emilsson	P01732	334.536
CDCP1	Q9H5V8	rs7621542	3	45206484	C	T	0.18	0.031	5.9e-09	0.8	3200	Emilsson	Q9H5V8	33.7149
CDH11	P55287	rs59614634	16	65029943	A	T	0.803	0.036	3.4e-101	0.89	3200	Emilsson	P55287	497.538
CFHR1	Q03591	rs57809726	1	196841377	A	G	1.295	0.027	1e-200	0.862	3200	Emilsson	Q03591	2300.45
CFHR4	Q92496	rs4915559	1	196886770	T	C	0.655	0.026	1.7e-131	0.753	3200	Emilsson	Q92496	634.652
CHST12	Q9NRB3	rs2969076	7	2473747	A	G	-0.235	0.036	7.3e-11	0.872	3200	Emilsson	Q9NRB3	42.6119
CLEC11A	Q9Y240	rs13866	19	51228746	C	T	0.154	0.026	4e-09	0.691	3200	Emilsson	Q9Y240	35.0828
CLEC1B	Q9P126	rs544605	12	10146707	T	C	-0.504	0.028	4.8e-70	0.781	3200	Emilsson	Q9P126	324
CLEC4C	Q8WTT0	rs11055602	12	7904111	T	G	-0.95	0.019	1e-200	0.567	3200	Emilsson	Q8WTT0	2500
CLN5	O75503	rs7996555	13	77562492	C	T	0.35	0.055	1.5e-10	0.946	3200	Emilsson	O75503	40.4959
CNP	P09543	rs12602950	17	40123829	A	G	0.187	0.027	3.8e-12	0.704	3200	Emilsson	P09543	47.9684
CPQ	Q9Y646	rs145746079	8	97832518	T	C	1.192	0.073	7.1e-58	0.972	3200	Emilsson	Q9Y646	266.629
CRHBP	P24387	rs6414971	5	76170674	T	A	-0.511	0.026	2.9e-79	0.741	3200	Emilsson	P24387	386.274
CRLF1	O75462	rs2238647	19	18710535	G	A	-0.286	0.029	1.4e-22	0.778	3200	Emilsson	O75462	97.2604
CROT	Q9UKG9	rs77463367	7	87006034	C	G	0.348	0.047	1.6e-13	0.93	3200	Emilsson	Q9UKG9	54.823
CRTAC1	Q9NQ79	rs588061	10	99642731	C	T	0.346	0.024	8.6e-47	0.529	3200	Emilsson	Q9NQ79	207.84
CRTAM	O95727	rs2370794	11	122714782	A	G	-0.236	0.026	5.8e-20	0.668	3200	Emilsson	O95727	82.3905
CRYZ	Q08257	rs3819946	1	75175886	T	C	-1.175	0.029	1e-200	0.861	3200	Emilsson	Q08257	1641.65
CST4	P01036	rs7270028	20	23681073	C	A	0.465	0.039	1.8e-31	0.896	3200	Emilsson	P01036	142.16
CTGF	P29279	rs9388953	6	132297509	G	A	0.353	0.03	8.7e-32	0.789	3200	Emilsson	P29279	138.454
CTSC	P53634	rs55897509	11	88066714	A	C	-0.926	0.041	2.3e-107	0.918	3200	Emilsson	P53634	510.099
CXCL10	P02778	rs4859589	4	76948299	G	A	0.133	0.0243978	5e-08	0.505	3200	Emilsson	P02778	29.7168
CYB5D2	Q8WUJ1	rs77246175	17	4072761	G	C	-0.342	0.046	2e-13	0.921	3200	Emilsson	Q8WUJ1	55.276
CYTL1	Q9NRR1	rs62291616	4	5052063	T	C	-0.354	0.029	1.2e-32	0.814	3200	Emilsson	Q9NRR1	149.008
DEFA1	P59665	rs4284061	8	6878257	A	T	0.171	0.024	3.3e-12	0.431	3200	Emilsson	P59665	50.7656
DKK2	Q9UBU2	rs77571736	4	107864984	G	C	0.945	0.047	2.2e-83	0.954	3200	Emilsson	Q9UBU2	404.267
DNER	Q8NFT8	rs35032874	2	230309360	T	G	0.162	0.029	1.7e-08	0.741	3200	Emilsson	Q8NFT8	31.2057
DPEP1	P16444	rs423135	16	89740873	G	A	-0.313	0.024	5.5e-39	0.429	3200	Emilsson	P16444	170.085
DUT	P33316	rs117540572	15	48670241	G	A	-0.339	0.05	2.1e-11	0.939	3200	Emilsson	P33316	45.9684
DYNLL2	Q96FJ2	rs35729384	17	56178900	C	T	0.161	0.025	2.9e-10	0.698	3200	Emilsson	Q96FJ2	41.4736
EBI3	Q14213	rs10409421	19	4254752	A	G	1.049	0.019	1e-200	0.716	3200	Emilsson	Q14213	3048.2
ECH1	Q13011	rs4802890	19	39304402	G	A	-0.533	0.044	2.2e-33	0.92	3200	Emilsson	Q13011	146.74
ENDOU	P21128	rs2072117	12	48131728	G	A	-0.163	0.026	3.8e-10	0.711	3200	Emilsson	P21128	39.3033
EPHA2	P29317	rs28629977	1	16497272	C	G	-0.148	0.023	2e-10	0.564	3200	Emilsson	P29317	41.4064
EPHB6	O15197	rs7789303	7	142552547	A	G	0.239	0.026	6.3e-20	0.725	3200	Emilsson	O15197	84.4985
F13B	P05160	rs12116643	1	196973183	T	C	0.547	0.033	1.2e-60	0.863	3200	Emilsson	P05160	274.756
FBLN1	P23142	rs67136035	22	45813433	T	D	0.132	0.0242144	5e-08	0.541	3200	Emilsson	P23142	29.7168
FCN3	O75636	rs2474283	1	27716213	T	C	0.716	0.048	1.1e-48	0.933	3200	Emilsson	O75636	222.507
FGFBP3	Q8TAT2	rs11186737	10	93666349	C	T	0.302	0.027	5.9e-28	0.746	3200	Emilsson	Q8TAT2	125.108
FGFR3	P22607	rs2403274	4	1754515	C	G	0.177	0.029	6.7e-10	0.752	3200	Emilsson	P22607	37.2521
FGL1	Q08830	rs7815429	8	17737357	T	C	-0.446	0.025	3.3e-70	0.313	3200	Emilsson	Q08830	318.266
FKBP7	Q9Y680	rs10930831	2	179303976	G	C	-0.365	0.027	2e-39	0.768	3200	Emilsson	Q9Y680	182.75
FMOD	Q06828	rs4971253	1	203321414	G	A	0.25	0.045	2.7e-08	0.921	3200	Emilsson	Q06828	30.8642
FTCD	O95954	rs149024257	21	47686213	G	A	-0.287	0.051	1.9e-08	0.938	3200	Emilsson	O95954	31.6682
GAA	P10253	rs12450199	17	78076592	A	C	0.369	0.025	1.4e-48	0.647	3200	Emilsson	P10253	217.858
GALNT16	Q8N428	rs12100668	14	69793475	G	A	-0.194	0.025	4.4e-15	0.408	3200	Emilsson	Q8N428	60.2176
GDI2	P50395	rs2890364	10	5833748	G	A	0.219	0.029	9.1e-14	0.774	3200	Emilsson	P50395	57.0285
GKN2	Q86XP6	rs13008230	2	69154583	T	G	0.942	0.076	2.7e-34	0.973	3200	Emilsson	Q86XP6	153.63
GLO1	Q04760	rs12209477	6	38669799	C	G	0.168	0.026	7.1e-11	0.66	3200	Emilsson	Q04760	41.7515
GNMT	Q14749	rs9471987	6	42944140	A	G	0.4	0.024	2.4e-61	0.402	3200	Emilsson	Q14749	277.778
GNPTG	Q9UJJ9	rs4984820	16	1407809	C	T	-0.344	0.046	8e-14	0.923	3200	Emilsson	Q9UJJ9	55.9244
GSN	P06396	rs76331566	9	124009014	C	T	0.398	0.068	5e-09	0.969	3200	Emilsson	P06396	34.2569
GSTM3	P21266	rs115929572	1	110246053	G	A	-0.249	0.031618	3.4e-15	0.935	3200	Emilsson	P21266	62.0199
HDGF	P51858	rs4399146	1	156713558	G	A	0.269	0.027	3.2e-23	0.717	3200	Emilsson	P51858	99.2606
HIBCH	Q6NVY1	rs291447	2	191177005	A	C	-0.631	0.023	2.9e-152	0.393	3200	Emilsson	Q6NVY1	752.667
HPSE	Q9Y251	rs11732810	4	84230878	G	T	0.541	0.028	7.7e-78	0.773	3200	Emilsson	Q9Y251	373.318
HSD17B14	Q9BPX1	rs473464	19	49334248	T	C	0.145	0.026	2.7e-08	0.498	3200	Emilsson	Q9BPX1	31.1021
IFNLR1	Q8IU57	rs12046369	1	24526135	G	T	0.244	0.035	3.3e-12	0.853	3200	Emilsson	Q8IU57	48.6008
IGDCC4	Q8TDY8	rs8034057	15	65789430	G	A	0.344	0.042	3.5e-16	0.905	3200	Emilsson	Q8TDY8	67.0839
IGFBP5	P24593	rs139739387	2	217402489	A	G	0.608	0.098	7e-10	0.984	3200	Emilsson	P24593	38.4906
IL10RB	Q08334	rs2834167	21	34640788	A	G	0.16	0.028	1.1e-08	0.732	3200	Emilsson	Q08334	32.6531
IL1R1	P14778	rs7588201	2	102746276	A	C	0.163	0.026	2.6e-10	0.722	3200	Emilsson	P14778	39.3033
IL7	P13232	rs72666886	8	79728782	C	T	0.34	0.042	5.3e-16	0.903	3200	Emilsson	P13232	65.5329
IMPAD1	Q9NX62	rs112433249	8	57876576	T	C	1.685	0.136	1.7e-34	0.992	3200	Emilsson	Q9NX62	153.505
INPP5B	P32019	rs61778082	1	38306356	T	C	0.547	0.034	2.1e-55	0.865	3200	Emilsson	P32019	258.831
ITIH2	P19823	rs73621225	10	7740905	T	A	-1.181	0.044	1.4e-142	0.933	3200	Emilsson	P19823	720.434
JAM3	Q9BX67	rs655627	11	134021859	A	G	0.184	0.024	4.1e-14	0.566	3200	Emilsson	Q9BX67	58.7778
KIAA1549L	Q6ZVL6	rs12792396	11	33417110	G	A	0.439	0.025	7.1e-68	0.381	3200	Emilsson	Q6ZVL6	308.354
KIAA2013	Q8IYS2	rs11588551	1	11941936	T	C	0.178	0.025	2e-12	0.418	3200	Emilsson	Q8IYS2	50.6944
KLK10	O43240	rs2569454	19	51523203	C	T	0.405	0.026	4.5e-54	0.641	3200	Emilsson	O43240	242.641
KLK13	Q9UKR3	rs3760739	19	51538561	G	T	0.388	0.025	3.9e-54	0.659	3200	Emilsson	Q9UKR3	240.87
KLRB1	Q12918	rs3933456	12	9753788	C	A	0.213	0.026	2.1e-16	0.625	3200	Emilsson	Q12918	67.1139
LAG3	P18627	rs3782735	12	6885076	A	G	0.154	0.025	4.3e-10	0.607	3200	Emilsson	P18627	37.9456
LANCL1	O43813	rs187097936	2	211362949	C	G	0.781	0.103	3.7e-14	0.985	3200	Emilsson	O43813	57.4947
LBP	P18428	rs73112473	20	37006729	C	T	1.009	0.043	2.4e-112	0.922	3200	Emilsson	P18428	550.612
LEAP2	Q969E1	rs57880964	5	132210674	G	C	-0.3	0.033	4.1e-19	0.838	3200	Emilsson	Q969E1	82.6446
LECT2	O14960	rs248160	5	135293512	T	C	-0.312	0.026	3.7e-33	0.67	3200	Emilsson	O14960	144
LGALS3BP	Q08380	rs4789847	17	77004644	A	G	-0.196	0.033	3.9e-09	0.829	3200	Emilsson	Q08380	35.2764
LGALS4	P56470	rs55945853	19	39230046	G	A	0.181	0.024	7.7e-14	0.51	3200	Emilsson	P56470	56.8767
LGALS9	O00182	rs62055780	17	25971795	T	C	0.203	0.03	7.9e-12	0.753	3200	Emilsson	O00182	45.7878
LGMN	Q99538	rs7140705	14	93224207	T	G	-0.268	0.045	3.6e-09	0.913	3200	Emilsson	Q99538	35.4686
LILRA3	Q8N6C8	rs398217	19	54793038	A	G	1.243	0.02	1e-200	0.773	3200	Emilsson	Q8N6C8	3862.62
LRP11	Q86VZ4	rs9371533	6	150210681	A	G	0.825	0.021	1e-200	0.376	3200	Emilsson	Q86VZ4	1543.37
LRP12	Q9Y561	rs72679151	8	105627117	C	T	-0.211	0.03	2.6e-12	0.796	3200	Emilsson	Q9Y561	49.4678
LRP8	Q14114	rs10218811	1	53805882	A	G	0.166	0.027	9.8e-10	0.725	3200	Emilsson	Q14114	37.7997
LRRC4C	Q9HCJ2	rs998447	11	40310789	A	C	-0.137	0.024	2.2e-08	0.538	3200	Emilsson	Q9HCJ2	32.5851
LSAMP	Q13449	rs17646258	3	116038249	C	T	0.222	0.031	1.5e-12	0.829	3200	Emilsson	Q13449	51.2841
LYVE1	Q9Y5Y7	rs114527818	11	10619041	T	A	-0.369	0.055	3.3e-11	0.951	3200	Emilsson	Q9Y5Y7	45.0119
MAN1A2	O60476	rs1289863	1	117854689	C	T	0.21	0.026	1.5e-15	0.692	3200	Emilsson	O60476	65.2367
MAN1C1	Q9NR34	rs3767879	1	26070909	C	T	0.172	0.023	9.3e-14	0.465	3200	Emilsson	Q9NR34	55.9244
MANF	P55145	rs1552074	3	51408051	T	C	0.391	0.035	2.6e-28	0.859	3200	Emilsson	P55145	124.801
MENT	Q9BUN1	rs12759273	1	151045024	C	A	0.669	0.116	8.6e-09	0.988	3200	Emilsson	Q9BUN1	33.2611
METTL24	Q5JXM2	rs12189608	6	110573292	A	T	0.378	0.061	7.4e-10	0.956	3200	Emilsson	Q5JXM2	38.3994
NCAM2	O15394	rs2826851	21	22835946	A	G	-0.37	0.027	1.7e-42	0.733	3200	Emilsson	O15394	187.791
NCR1	O76036	rs143981324	19	55419632	T	C	0.362	0.042	1.3e-17	0.904	3200	Emilsson	O76036	74.288
NEGR1	Q7Z3B1	rs2220253	1	72565460	T	C	0.148	0.024	1.2e-09	0.545	3200	Emilsson	Q7Z3B1	38.0278
NLGN2	Q8NFZ4	rs150452493	17	7303808	C	T	0.252	0.04	4.9e-10	0.9	3200	Emilsson	Q8NFZ4	39.69
NMB	P08949	rs12912342	15	85248216	T	C	0.164	0.025	7.6e-11	0.661	3200	Emilsson	P08949	43.0336
NPNT	Q6UXI9	rs78213340	4	106819613	T	C	0.314	0.049	1.7e-10	0.93	3200	Emilsson	Q6UXI9	41.0646
NPTXR	O95502	rs12628473	22	39240717	A	G	-1.013	0.107	4.6e-21	0.987	3200	Emilsson	O95502	89.6296
NQO2	P16083	rs138616686	6	3003970	A	G	0.435	0.025	3.8e-64	0.626	3200	Emilsson	P16083	302.76
NTM	Q9P121	rs2511504	11	131196396	T	C	-0.381	0.023	1.7e-58	0.588	3200	Emilsson	Q9P121	274.406
NTRK3	Q16288	rs9944243	15	88514162	T	G	-0.221	0.035	5.2e-10	0.879	3200	Emilsson	Q16288	39.8702
OLFM1	Q99784	rs11103667	9	137978360	C	T	-0.193	0.032	2.6e-09	0.815	3200	Emilsson	Q99784	36.376
OLFM2	O95897	rs56243392	19	10061960	A	T	-0.673	0.024	6e-157	0.651	3200	Emilsson	O95897	786.335
OSCAR	Q8IYS5	rs4442925	19	54554950	T	C	0.138	0.024	1.3e-08	0.455	3200	Emilsson	Q8IYS5	33.0625
OXT	P01178	rs877172	20	3049890	T	G	-0.669	0.024	5.6e-156	0.66	3200	Emilsson	P01178	777.016
PCBD1	P61457	rs72818110	10	72614896	A	C	0.374	0.057	7.6e-11	0.951	3200	Emilsson	P61457	43.052
PCDH9	Q9HC56	rs1927820	13	67774646	G	C	-0.266	0.033	2.2e-15	0.846	3200	Emilsson	Q9HC56	64.9734
PCSK9	Q8NBP7	rs191448950	1	55584844	G	A	1.069	0.113	8.4e-21	0.989	3200	Emilsson	Q8NBP7	89.4949
PCYOX1	Q9UHG3	rs2706762	2	70488470	C	T	0.79	0.032	1.4e-121	0.86	3200	Emilsson	Q9UHG3	609.473
PDIA3	P30101	rs3110081	15	43995786	C	T	0.194	0.032	1.5e-09	0.821	3200	Emilsson	P30101	36.7539
PDLIM4	P50479	rs6864922	5	131616290	C	T	0.676	0.048	1.5e-44	0.937	3200	Emilsson	P50479	198.34
PEBP1	P30086	rs76597567	12	118584885	A	G	1.971	0.085	4e-111	0.982	3200	Emilsson	P30086	537.694
PGLYRP2	Q96PD5	rs55866012	19	15578008	T	G	0.486	0.033	1.8e-47	0.842	3200	Emilsson	Q96PD5	216.893
PIP	P12273	rs4726600	7	142881540	G	A	-0.188	0.027	7.8e-12	0.741	3200	Emilsson	P12273	48.4829
PKDCC	Q504Y2	rs893812	2	42303114	C	T	-0.236	0.027	5.6e-18	0.731	3200	Emilsson	Q504Y2	76.4005
PLAT	P00750	rs77346091	8	42020158	T	C	0.549	0.077	1.2e-12	0.973	3200	Emilsson	P00750	50.835
PLAUR	Q03405	rs2302524	19	44156472	T	C	0.22	0.031	7.9e-13	0.82	3200	Emilsson	Q03405	50.3642
PLXNA1	Q9UIW2	rs891762	3	126739012	G	T	-0.182	0.027	9.6e-12	0.318	3200	Emilsson	Q9UIW2	45.4376
PNLIPRP2	P54317	rs7910135	10	118398046	C	A	-0.969	0.018	1e-200	0.493	3200	Emilsson	P54317	2898.03
POSTN	Q15063	rs962462	13	38089171	A	G	0.244	0.025	8.6e-23	0.714	3200	Emilsson	Q15063	95.2576
PRDX6	P30041	rs6671141	1	173446934	T	G	-0.413	0.034	8.8e-33	0.85	3200	Emilsson	P30041	147.551
PREP	P48147	rs1051484	6	105726036	C	T	-0.453	0.032	7e-44	0.835	3200	Emilsson	P48147	200.399
PROK2	Q9HC23	rs7644362	3	71829242	A	G	-1.001	0.025	1e-200	0.798	3200	Emilsson	Q9HC23	1603.2
PRSS57	Q6UWY2	rs9304936	19	689590	G	C	0.599	0.026	7.5e-107	0.715	3200	Emilsson	Q6UWY2	530.771
PSAP	P07602	rs7086891	10	73655350	G	A	0.619	0.025	3.6e-122	0.709	3200	Emilsson	P07602	613.058
PSMB1	P20618	rs756519	6	170850862	G	A	0.412	0.023	8.1e-67	0.531	3200	Emilsson	P20618	320.877
PTGR1	Q14914	rs112140014	9	114325849	G	C	-0.726	0.055	2.1e-38	0.952	3200	Emilsson	Q14914	174.24
PTPRU	Q92729	rs2179795	1	29642318	G	T	0.154	0.028	3.8e-08	0.725	3200	Emilsson	Q92729	30.25
PXDN	Q92626	rs34008669	2	1709779	G	A	0.158	0.023	1.8e-11	0.502	3200	Emilsson	Q92626	47.1909
PYY	P10082	rs8074783	17	42028989	C	A	0.157	0.026	1.2e-09	0.641	3200	Emilsson	P10082	36.463
PZP	P20742	rs7311982	12	9314857	C	T	0.5	0.019	2.7e-135	0.698	3200	Emilsson	P20742	692.521
QPCT	Q16769	rs13027919	2	37567636	C	T	0.271	0.024	3.5e-28	0.538	3200	Emilsson	Q16769	127.502
RAB6B	Q9NRW1	rs9813363	3	133604743	G	A	0.278	0.032	1.2e-17	0.825	3200	Emilsson	Q9NRW1	75.4727
RBP4	P02753	rs36014035	10	95360027	A	C	0.147	0.025	7.2e-09	0.643	3200	Emilsson	P02753	34.5744
RECQL	P46063	rs144436375	12	21515500	A	C	-0.935	0.086	9e-27	0.98	3200	Emilsson	P46063	118.202
REG3G	Q6UW15	rs429694	2	79244586	A	C	-0.487	0.028	9.5e-63	0.794	3200	Emilsson	Q6UW15	302.511
RNASE3	P12724	rs2771316	14	21430474	C	T	0.214	0.028	1.2e-14	0.723	3200	Emilsson	P12724	58.4133
RNPEP	Q9H4A4	rs59698324	1	201965855	C	T	0.371	0.027	3.8e-42	0.725	3200	Emilsson	Q9H4A4	188.808
RSPO4	Q2I0M5	rs6056847	20	1028346	G	A	-0.172	0.023	9e-14	0.575	3200	Emilsson	Q2I0M5	55.9244
S100A7	P31151	rs3014860	1	153314782	A	G	-1.208	0.051	1.8e-114	0.948	3200	Emilsson	P31151	561.04
SCUBE1	Q8IWY4	rs2744874	22	43715862	T	C	-0.27	0.036	3.8e-14	0.866	3200	Emilsson	Q8IWY4	56.25
SELPLG	Q14242	rs73191242	12	109013956	G	A	0.209	0.03	2.1e-12	0.795	3200	Emilsson	Q14242	48.5344
SEMA4C	Q9C0C4	rs112826173	2	97489654	A	G	0.713	0.09	4e-15	0.981	3200	Emilsson	Q9C0C4	62.7616
SEMA4D	Q92854	rs45464494	9	91994433	C	T	1.278	0.041	1.5e-187	0.929	3200	Emilsson	Q92854	971.615
SERPINA11	Q86U17	rs17090881	14	94913209	C	A	0.288	0.031	1.8e-20	0.835	3200	Emilsson	Q86U17	86.3101
SFRP4	Q6FHJ7	rs75474297	7	37973124	T	A	-0.302	0.034	2.1e-18	0.855	3200	Emilsson	Q6FHJ7	78.8962
SFTPB	P07988	rs1130866	2	85893741	A	G	-0.686	0.022	3.5e-189	0.466	3200	Emilsson	P07988	972.306
SHANK3	Q9BYB0	rs6010042	22	51098764	G	A	-0.327	0.027	6.6e-33	0.748	3200	Emilsson	Q9BYB0	146.679
SHBG	P04278	rs858519	17	7531965	T	C	-0.214	0.024	2.3e-18	0.474	3200	Emilsson	P04278	79.5069
SHMT1	P34896	rs8067462	17	18263571	C	A	-0.3	0.025	1e-31	0.607	3200	Emilsson	P34896	144
SLITRK3	O94933	rs62282371	3	164911694	T	G	0.345	0.038	3.7e-19	0.887	3200	Emilsson	O94933	82.4273
SMPD1	P17405	rs1050239	11	6415463	G	A	0.31	0.026	1.8e-31	0.715	3200	Emilsson	P17405	142.16
SOD3	P08294	rs2695234	4	24804238	G	A	-0.736	0.042	1.1e-64	0.919	3200	Emilsson	P08294	307.084
SPINK1	P00995	rs4705205	5	147218813	T	C	-0.212	0.025	1.5e-17	0.573	3200	Emilsson	P00995	71.9104
SPINK5	Q9NQ38	rs2052536	5	147504557	T	G	-0.152	0.026	3.3e-09	0.349	3200	Emilsson	Q9NQ38	34.1775
SPON2	Q9BUD6	rs878323	4	1169813	T	G	-0.213	0.026	1.8e-16	0.687	3200	Emilsson	Q9BUD6	67.1139
SRL	Q86TD4	rs8046884	16	4269558	C	G	0.15	0.024	6.3e-10	0.495	3200	Emilsson	Q86TD4	39.0625
ST6GALNAC6	Q969X2	rs183995738	9	130542640	C	A	-0.715	0.107	3.1e-11	0.987	3200	Emilsson	Q969X2	44.6524
SULT2A1	Q06520	rs296369	19	48371853	C	T	0.36	0.033	1.7e-27	0.843	3200	Emilsson	Q06520	119.008
TF	P02787	rs4854760	3	133498741	A	G	-0.227	0.028	6.1e-16	0.735	3200	Emilsson	P02787	65.7258
TGFB1	P01137	rs1800470	19	41858921	A	G	0.259	0.024	4.5e-26	0.621	3200	Emilsson	P01137	116.46
THBS4	P35443	rs35351529	5	79390222	T	C	-0.298	0.044	2.3e-11	0.923	3200	Emilsson	P35443	45.8698
TIMP2	P16035	rs2376999	17	76890864	A	G	0.418	0.037	3.3e-29	0.884	3200	Emilsson	P16035	127.629
TMEM106B	Q9NUM4	rs10950398	7	12264871	A	G	-0.272	0.025	6.1e-27	0.393	3200	Emilsson	Q9NUM4	118.374
TMEM132D	Q14C87	rs61943549	12	130092229	T	C	-0.486	0.055	1e-18	0.948	3200	Emilsson	Q14C87	78.0813
TNFRSF10B	O14763	rs4871844	8	22879734	T	C	-0.143	0.026	4.3e-08	0.658	3200	Emilsson	O14763	30.25
TNFRSF19	Q9NS68	rs3814787	13	24152370	G	C	-0.166	0.026	2.1e-10	0.714	3200	Emilsson	Q9NS68	40.7633
TREM1	Q9NP99	rs3789204	6	41254741	G	T	-0.374	0.024	1.4e-54	0.693	3200	Emilsson	Q9NP99	242.84
TREM2	Q9NZC2	rs114812713	6	41034000	G	C	0.36	0.057	3.1e-10	0.955	3200	Emilsson	Q9NZC2	39.8892
TREML1	Q86YW5	rs62396317	6	41095817	A	G	0.211	0.038	2.9e-08	0.878	3200	Emilsson	Q86YW5	30.8317
TXNDC15	Q96J42	rs78165052	5	134250596	C	T	-0.307	0.036	3.6e-17	0.875	3200	Emilsson	Q96J42	72.723
TYMP	P19971	rs131798	22	50971509	G	T	0.204	0.03	1.8e-11	0.773	3200	Emilsson	P19971	46.24
TYRO3	Q06418	rs2289743	15	41860698	C	G	-0.161	0.027	2.1e-09	0.691	3200	Emilsson	Q06418	35.5569
UBASH3B	Q8TF42	rs10502249	11	122504251	G	T	0.187	0.027	1.1e-11	0.712	3200	Emilsson	Q8TF42	47.9684
UGT1A6	P19224	rs111741722	2	234665983	A	G	0.265	0.027	1.8e-22	0.681	3200	Emilsson	P19224	96.3306
ULBP3	Q9BZM4	rs17054300	6	150370552	G	A	0.171	0.028	1.7e-09	0.762	3200	Emilsson	Q9BZM4	37.2972
UNC5D	Q6UXZ4	rs6468316	8	35237788	T	C	0.141	0.024	9.5e-09	0.417	3200	Emilsson	Q6UXZ4	34.5156
UST	Q9Y2C2	rs11155591	6	149064986	C	T	0.149	0.026	1.2e-08	0.685	3200	Emilsson	Q9Y2C2	32.8417
UXS1	Q8NBZ7	rs12617748	2	106836042	G	A	-0.219	0.036	1.7e-09	0.87	3200	Emilsson	Q8NBZ7	37.0069
VAV1	P15498	rs56100731	19	6857245	C	T	0.363	0.048	5.6e-14	0.93	3200	Emilsson	P15498	57.1914
VWA2	Q5GFL6	rs11595697	10	115905775	C	T	-0.431	0.042	7.8e-25	0.903	3200	Emilsson	Q5GFL6	105.307
VWC2	Q2TAL6	rs79259707	7	49812564	C	A	0.34	0.035	1.3e-22	0.868	3200	Emilsson	Q2TAL6	94.3673
WARS	P23381	rs941923	14	100813077	C	T	0.255	0.029	6.6e-18	0.766	3200	Emilsson	P23381	77.3187
WFDC1	Q9HC57	rs400345	16	84328494	C	T	0.451	0.029	5.5e-54	0.791	3200	Emilsson	Q9HC57	241.856
WFDC5	Q8TCV5	rs35017113	20	43692684	C	T	0.229	0.033	4.7e-12	0.843	3200	Emilsson	Q8TCV5	48.1552
WFIKKN1	Q96NZ8	rs11248941	16	658271	G	T	-0.203	0.028	2.3e-13	0.732	3200	Emilsson	Q96NZ8	52.5625
WISP2	O76076	rs1061098	20	43356156	C	T	0.213	0.022	4.8e-21	0.663	3200	Emilsson	O76076	93.7376
XXYLT1	Q8NBI6	rs55947051	3	194783033	T	C	-0.248	0.033	8.6e-14	0.841	3200	Emilsson	Q8NBI6	56.4775
ZG16B	Q96DA0	rs2190809	16	2880614	C	T	0.156	0.027	1.5e-08	0.725	3200	Emilsson	Q96DA0	33.3827
