# Supplementary material for: Proteome-wide mendelian randomization study implicates therapeutic targets in common cancers
Source: J Transl Med. 2023 Sep 21;21:646. doi: 10.1186/s12967-023-04525-5 (PMC10512580; doi:10.1186/s12967-023-04525-5)
Supplement: Supplementary file 1 — Additional file 1: Table S1. Instrumental variables of plasma proteins used in MR analysis. Table S2. The sources for all statistical summary datasets used in this study. Table S3. Casual effects between 3 site-specific cancers and 13 identified proteins in the bidirectional MR analysis. Table S4. The results of heterogeneity analysis. Table S5. Investigating the Previous Genome-Wide Significant Associations of SNPs as Genetic Instruments for Potential Causal Proteins. Table S6. Genetic Instruments for Drug Targets Validated in External Validation. Table S7. Current anticancer medications and corresponding targets for cancer treatment. Table S8. Current medications targeting potential causal proteins. Table S9. Distinct target groups of identified proteins. Figure S1. Colocalization Analysis of Plasma Proteins for prostate cancer. The diamond purple points represent SNPs that exhibit the lowest combined P-value in both protein GWAS and cancer GWAS analyses. Figure S2. Colocalization Analysis of Plasma Proteins for breast cancer.The diamond purple points represent SNPs that exhibit the lowest combined P-value in both protein GWAS and cancer GWAS analyses. Figure S3. Colocalization Analysis of Plasma Proteins for lung cancer. The diamond purple points represent SNPs that exhibit the lowest combined P-value in both protein GWAS and cancer GWAS analyses. Figure S4. Protein–protein interaction network between identified proteins and cancer-associated medication targets. Green circles represent the targets of current medications for prostate cancer; Red circles represent potential drug targets identified in this study; Blue circles represent the current medications targets that interact with potential drug targets. R-detailed code. [file 12967_2023_4525_MOESM1_ESM.zip › Table S3.xlsx]

## Sheet: Sheet1
Table S3. Casual effects between 3 site-specific cancers and 13 identified proteins in the bidirectional MR analysis
exposure	id.outcome	outcome	method	beta	se	pval	or
prostate cancer	Plasma_CTSS	CTSS	MR Egger	0.078277	0.076492	0.309626	1.08142
prostate cancer	Plasma_CTSS	CTSS	Weighted median	0.01685	0.016093	0.29508	1.01699
prostate cancer	Plasma_CTSS	CTSS	Inverse variance weighted	-0.00971	0.039476	0.805665	0.990337
prostate cancer	Plasma_CTSS	CTSS	Simple mode	0.030103	0.03167	0.34502	1.03056
prostate cancer	Plasma_CTSS	CTSS	Weighted mode	0.01981	0.018622	0.290977	1.02001
prostate cancer	Plasma_GSTP1	GSTP1	MR Egger	0.0392	0.020877	0.0646569	1.03998
prostate cancer	Plasma_GSTP1	GSTP1	Weighted median	0.010131	0.016009	0.526873	1.01018
prostate cancer	Plasma_GSTP1	GSTP1	Inverse variance weighted	0.010428	0.010863	0.337053	1.01048
prostate cancer	Plasma_GSTP1	GSTP1	Simple mode	0.016759	0.0283	0.555636	1.0169
prostate cancer	Plasma_GSTP1	GSTP1	Weighted mode	0.009822	0.019931	0.623709	1.00987
prostate cancer	Plasma_HDGF	HDGF	MR Egger	0.035139	0.020154	0.0855704	1.03576
prostate cancer	Plasma_HDGF	HDGF	Weighted median	0.024675	0.014795	0.0953519	1.02498
prostate cancer	Plasma_HDGF	HDGF	Inverse variance weighted	0.025002	0.010292	0.015129	1.02532
prostate cancer	Plasma_HDGF	HDGF	Simple mode	0.0262	0.031979	0.415316	1.02655
prostate cancer	Plasma_HDGF	HDGF	Weighted mode	0.022033	0.020558	0.287416	1.02228
prostate cancer	Plasma_IGF2R	IGF2R	MR Egger	0.02541	0.020445	0.218015	1.02574
prostate cancer	Plasma_IGF2R	IGF2R	Weighted median	0.027008	0.015936	0.090112	1.02738
prostate cancer	Plasma_IGF2R	IGF2R	Inverse variance weighted	0.023364	0.010505	0.0261465	1.02364
prostate cancer	Plasma_IGF2R	IGF2R	Simple mode	0.03	0.031265	0.340496	1.03045
prostate cancer	Plasma_IGF2R	IGF2R	Weighted mode	0.021243	0.018737	0.260647	1.02147
prostate cancer	Plasma_KDELC2	KDELC2	MR Egger	0.007196	0.019412	0.711959	1.00722
prostate cancer	Plasma_KDELC2	KDELC2	Weighted median	0.011071	0.015252	0.467917	1.01113
prostate cancer	Plasma_KDELC2	KDELC2	Inverse variance weighted	0.013113	0.00998	0.188869	1.0132
prostate cancer	Plasma_KDELC2	KDELC2	Simple mode	0.012768	0.028421	0.654621	1.01285
prostate cancer	Plasma_KDELC2	KDELC2	Weighted mode	0.01429	0.019198	0.459086	1.01439
prostate cancer	Plasma_SPINT2	SPINT2	MR Egger	0.005127	0.066131	0.93842	1.00514
prostate cancer	Plasma_SPINT2	SPINT2	Weighted median	-0.00514	0.014953	0.731268	0.994873
prostate cancer	Plasma_SPINT2	SPINT2	Inverse variance weighted	0.040463	0.033784	0.231042	1.04129
prostate cancer	Plasma_SPINT2	SPINT2	Simple mode	-0.02432	0.028678	0.399147	0.975973
prostate cancer	Plasma_SPINT2	SPINT2	Weighted mode	-0.00602	0.017784	0.735971	0.993998
prostate cancer	Plasma_TNFRS10B	TNFRSF10B	MR Egger	0.032134	0.021728	0.143579	1.03266
prostate cancer	Plasma_TNFRS10B	TNFRSF10B	Weighted median	0.011313	0.015855	0.475497	1.01138
prostate cancer	Plasma_TNFRS10B	TNFRSF10B	Inverse variance weighted	0.013433	0.011141	0.227931	1.01352
prostate cancer	Plasma_TNFRS10B	TNFRSF10B	Simple mode	0.020839	0.032081	0.518042	1.02106
prostate cancer	Plasma_TNFRS10B	TNFRSF10B	Weighted mode	0.015843	0.021466	0.462887	1.01597
breast cancer	Plasma_CPNE1	CPNE1	MR Egger	0.007048	0.02587	0.785892	1.00707
breast cancer	Plasma_CPNE1	CPNE1	Weighted median	0.005251	0.018925	0.781429	1.00527
breast cancer	Plasma_CPNE1	CPNE1	Inverse variance weighted	0.000321	0.012293	0.979153	1.00032
breast cancer	Plasma_CPNE1	CPNE1	Simple mode	0.033139	0.040264	0.412521	1.03369
breast cancer	Plasma_CPNE1	CPNE1	Weighted mode	-0.00202	0.022744	0.929567	0.997982
breast cancer	Plasma_CTSH	CTSH	MR Egger	5.33e-06	0.024978	0.99983	1.00001
breast cancer	Plasma_CTSH	CTSH	Weighted median	-0.00026	0.019443	0.989383	0.99974
breast cancer	Plasma_CTSH	CTSH	Inverse variance weighted	0.013843	0.011917	0.245397	1.01394
breast cancer	Plasma_CTSH	CTSH	Simple mode	0.061037	0.042479	0.154008	1.06294
breast cancer	Plasma_CTSH	CTSH	Weighted mode	0.00249	0.023688	0.916509	1.00249
breast cancer	Plasma_GDI2	GDI2	MR Egger	0.011218	0.025299	0.658485	1.01128
breast cancer	Plasma_GDI2	GDI2	Weighted median	-0.00912	0.017862	0.609645	0.990921
breast cancer	Plasma_GDI2	GDI2	Inverse variance weighted	0.006334	0.012013	0.59803	1.00635
breast cancer	Plasma_GDI2	GDI2	Simple mode	-0.00855	0.036875	0.817221	0.991486
breast cancer	Plasma_GDI2	GDI2	Weighted mode	-0.00446	0.022723	0.844853	0.99555
breast cancer	Plasma_ISLR2	ISLR2	MR Egger	0.019342	0.024963	0.44037	1.01953
breast cancer	Plasma_ISLR2	ISLR2	Weighted median	0.026493	0.019616	0.176833	1.02685
breast cancer	Plasma_ISLR2	ISLR2	Inverse variance weighted	0.011697	0.012153	0.335826	1.01177
breast cancer	Plasma_ISLR2	ISLR2	Simple mode	0.048197	0.044625	0.28283	1.04938
breast cancer	Plasma_ISLR2	ISLR2	Weighted mode	0.042134	0.021656	0.05463	1.04303
breast cancer	Plasma_PDIA3	PDIA3	MR Egger	-0.01025	0.026012	0.694363	0.989802
breast cancer	Plasma_PDIA3	PDIA3	Weighted median	-0.01244	0.018194	0.494125	0.987637
breast cancer	Plasma_PDIA3	PDIA3	Inverse variance weighted	-0.01237	0.012318	0.31514	0.987706
breast cancer	Plasma_PDIA3	PDIA3	Simple mode	-0.0101	0.033207	0.761556	0.989951
breast cancer	Plasma_PDIA3	PDIA3	Weighted mode	-0.00584	0.023135	0.801338	0.994177
lung cancer	Plasma_CTSH	CTSH	MR Egger	0.058418	0.120374	0.636984	1.06016
lung cancer	Plasma_CTSH	CTSH	Weighted median	0.072135	0.037175	0.05233	1.0748
lung cancer	Plasma_CTSH	CTSH	Inverse variance weighted	0.029569	0.052435	0.572801	1.03001
lung cancer	Plasma_CTSH	CTSH	Simple mode	-0.04042	0.076263	0.605757	0.960386
lung cancer	Plasma_CTSH	CTSH	Weighted mode	0.134637	0.034803	0.002234	1.14412
lung cancer	Plasma_FLRT3	FLRT3	MR Egger	0.033584	0.051749	0.52967	1.03415
lung cancer	Plasma_FLRT3	FLRT3	Weighted median	-0.01103	0.026956	0.682348	0.989031
lung cancer	Plasma_FLRT3	FLRT3	Inverse variance weighted	-0.03071	0.024873	0.216974	0.969757
lung cancer	Plasma_FLRT3	FLRT3	Simple mode	-0.05714	0.068391	0.419772	0.944462
lung cancer	Plasma_FLRT3	FLRT3	Weighted mode	0.039614	0.026371	0.158907	1.04041
lung cancer	Plasma_ICAM5	ICAM5	MR Egger	0.033584	0.051749	0.52967	1.03415
lung cancer	Plasma_ICAM5	ICAM5	Weighted median	-0.01103	0.026508	0.677283	0.989031
lung cancer	Plasma_ICAM5	ICAM5	Inverse variance weighted	-0.03071	0.024873	0.216974	0.969757
lung cancer	Plasma_ICAM5	ICAM5	Simple mode	-0.05714	0.071265	0.438269	0.944462
lung cancer	Plasma_ICAM5	ICAM5	Weighted mode	0.039614	0.027344	0.173048	1.04041
lung cancer	Plasma_SFTPB	SFTPB	MR Egger	0.09249	0.069244	0.208625	1.0969
lung cancer	Plasma_SFTPB	SFTPB	Weighted median	0.058132	0.031803	0.067566	1.05985
lung cancer	Plasma_SFTPB	SFTPB	Inverse variance weighted	-0.01	0.034331	0.770881	0.99005
lung cancer	Plasma_SFTPB	SFTPB	Simple mode	-0.16684	0.107296	0.145919	0.846335
lung cancer	Plasma_SFTPB	SFTPB	Weighted mode	0.063319	0.032923	0.0785	1.06537
