# Supplementary material for: Proteome-wide mendelian randomization study implicates therapeutic targets in common cancers
Source: J Transl Med. 2023 Sep 21;21:646. doi: 10.1186/s12967-023-04525-5 (PMC10512580; doi:10.1186/s12967-023-04525-5)
Supplement: Supplementary file 1 — Additional file 1: Table S1. Instrumental variables of plasma proteins used in MR analysis. Table S2. The sources for all statistical summary datasets used in this study. Table S3. Casual effects between 3 site-specific cancers and 13 identified proteins in the bidirectional MR analysis. Table S4. The results of heterogeneity analysis. Table S5. Investigating the Previous Genome-Wide Significant Associations of SNPs as Genetic Instruments for Potential Causal Proteins. Table S6. Genetic Instruments for Drug Targets Validated in External Validation. Table S7. Current anticancer medications and corresponding targets for cancer treatment. Table S8. Current medications targeting potential causal proteins. Table S9. Distinct target groups of identified proteins. Figure S1. Colocalization Analysis of Plasma Proteins for prostate cancer. The diamond purple points represent SNPs that exhibit the lowest combined P-value in both protein GWAS and cancer GWAS analyses. Figure S2. Colocalization Analysis of Plasma Proteins for breast cancer.The diamond purple points represent SNPs that exhibit the lowest combined P-value in both protein GWAS and cancer GWAS analyses. Figure S3. Colocalization Analysis of Plasma Proteins for lung cancer. The diamond purple points represent SNPs that exhibit the lowest combined P-value in both protein GWAS and cancer GWAS analyses. Figure S4. Protein–protein interaction network between identified proteins and cancer-associated medication targets. Green circles represent the targets of current medications for prostate cancer; Red circles represent potential drug targets identified in this study; Blue circles represent the current medications targets that interact with potential drug targets. R-detailed code. [file 12967_2023_4525_MOESM1_ESM.zip › Table S4.xlsx]

## Sheet: Sheet1
Table S4. The results of heterogeneity analysis
outcome	exposure	method	Q	Q_df	Q_pval
Prostate cancer	SPARCL1	Inverse variance weighted	0.256125	1	0.612795
Prostate cancer	PLXNC1	Inverse variance weighted	0.269303	1	0.6038
Prostate cancer	SERPINA4	Inverse variance weighted	0.138255	1	0.710022
Prostate cancer	GPC5	Inverse variance weighted	1.47212	1	0.225012
Breast cancer	SPARCL1	Inverse variance weighted	0.432078	1	0.510971
Breast cancer	PLXNC1	Inverse variance weighted	0.278215	1	0.597873
Breast cancer	GPC5	Inverse variance weighted	0.0812932	1	0.775552
Lung cancer	THSD1	Inverse variance weighted	7.7e-34	1	1
Lung cancer	CSF1	Inverse variance weighted	0	1	1
Lung cancer	MIA	Inverse variance weighted	1.11e-31	1	1
Lung cancer	TPST2	Inverse variance weighted	1.23e-32	1	1
Lung cancer	IL5RA	Inverse variance weighted	4.93e-32	1	1
Lung cancer	KDELC2	Inverse variance weighted	0	1	1
Lung cancer	IL18	Inverse variance weighted	0	1	1
Lung cancer	C1QTNF5	Inverse variance weighted	0	1	1
Lung cancer	MCAM	Inverse variance weighted	0	1	1
Lung cancer	ADAM23	Inverse variance weighted	0	1	1
Lung cancer	RELT	Inverse variance weighted	4.93e-32	1	1
Lung cancer	LGALS3	Inverse variance weighted	3.08e-33	1	1
Lung cancer	ENTPD5	Inverse variance weighted	1.23e-32	1	1
Lung cancer	SERPINA3	Inverse variance weighted	0	1	1
Lung cancer	PTN	Inverse variance weighted	0	1	1
Lung cancer	AKR1B1	Inverse variance weighted	0	1	1
Lung cancer	ACP5	Inverse variance weighted	3.08e-33	1	1
Lung cancer	PENK	Inverse variance weighted	4.93e-32	1	1
Lung cancer	SELP	Inverse variance weighted	0	1	1
Lung cancer	ANGPTL1	Inverse variance weighted	0	1	1
Lung cancer	CFH	Inverse variance weighted	0	1	1
Lung cancer	RIDA	Inverse variance weighted	1.23e-32	1	1
Lung cancer	NOV	Inverse variance weighted	4.93e-32	1	1
Lung cancer	ST3GAL1	Inverse variance weighted	4.93e-32	1	1
Lung cancer	CCDC126	Inverse variance weighted	0	1	1
Lung cancer	PLA2G2A	Inverse variance weighted	0	1	1
Lung cancer	C1QC	Inverse variance weighted	0	1	1
Lung cancer	MGP	Inverse variance weighted	1.93e-34	1	1
Lung cancer	PPIL1	Inverse variance weighted	1.97e-31	1	1
Lung cancer	MAPK13	Inverse variance weighted	1.23e-32	1	1
Lung cancer	CRISP2	Inverse variance weighted	1.97e-31	1	1
Lung cancer	KDR	Inverse variance weighted	4.93e-32	1	1
Lung cancer	SPARCL1	MR Egger	5.55e-32	2	1
Lung cancer	SPARCL1	Inverse variance weighted	0.669	3	0.880544
Lung cancer	TPST1	Inverse variance weighted	0	1	1
Lung cancer	UCMA	Inverse variance weighted	1.23e-32	1	1
Lung cancer	CPB2	Inverse variance weighted	4.93e-32	1	1
Lung cancer	CD177	Inverse variance weighted	1.93e-34	1	1
Lung cancer	ST3GAL6	Inverse variance weighted	1.23e-32	1	1
Lung cancer	CLPS	Inverse variance weighted	7.7e-34	1	1
Lung cancer	CD48	Inverse variance weighted	0	1	1
Lung cancer	CNTNAP2	Inverse variance weighted	0	1	1
Lung cancer	RARRES2	Inverse variance weighted	4.93e-32	1	1
Lung cancer	SCARF2	Inverse variance weighted	0	1	1
Lung cancer	KLK8	Inverse variance weighted	0	1	1
Lung cancer	RGMA	Inverse variance weighted	0	1	1
Lung cancer	IL6ST	Inverse variance weighted	0	1	1
Lung cancer	CCL15	Inverse variance weighted	0	1	1
Lung cancer	APOA5	Inverse variance weighted	4.93e-32	1	1
Lung cancer	LY9	Inverse variance weighted	0	1	1
Lung cancer	LHB	Inverse variance weighted	0	1	1
Lung cancer	PPP3CA;PPP3R1	Inverse variance weighted	0	1	1
Lung cancer	EFEMP1	Inverse variance weighted	1.97e-31	1	1
Lung cancer	TGFBI	Inverse variance weighted	4.93e-32	1	1
Lung cancer	UROS	Inverse variance weighted	4.93e-32	1	1
Lung cancer	CSGALNACT2	Inverse variance weighted	3.08e-33	1	1
Lung cancer	ESD	Inverse variance weighted	4.93e-32	1	1
Lung cancer	GSTA1	Inverse variance weighted	7.89e-31	1	1
Lung cancer	ACP1	Inverse variance weighted	1.23e-32	1	1
Lung cancer	CRISPLD2	Inverse variance weighted	0	1	1
Lung cancer	QDPR	Inverse variance weighted	4.93e-32	1	1
Lung cancer	QSOX1	Inverse variance weighted	3.08e-33	1	1
Lung cancer	SERPINF1	Inverse variance weighted	4.93e-32	1	1
Lung cancer	ADGRE2	Inverse variance weighted	1.23e-32	1	1
Lung cancer	MATN4	Inverse variance weighted	7.7e-34	1	1
Lung cancer	CP	Inverse variance weighted	0	1	1
Lung cancer	GLTPD2	Inverse variance weighted	4.93e-32	1	1
Lung cancer	MANSC4	Inverse variance weighted	1.97e-31	1	1
Lung cancer	LILRA5	Inverse variance weighted	4.44e-31	1	1
Lung cancer	DLK1	Inverse variance weighted	0	1	1
Lung cancer	NTN4	Inverse variance weighted	0	1	1
Lung cancer	CFI	Inverse variance weighted	1.23e-32	1	1
Lung cancer	IL1RAP	Inverse variance weighted	3.08e-33	1	1
Lung cancer	SCARF1	Inverse variance weighted	0	1	1
Lung cancer	FUT3	Inverse variance weighted	1.97e-31	1	1
Lung cancer	REG1A	Inverse variance weighted	0	1	1
Lung cancer	CPNE1	Inverse variance weighted	4.93e-32	1	1
Lung cancer	AGT	Inverse variance weighted	7.7e-34	1	1
Lung cancer	ERAP2	Inverse variance weighted	0	1	1
Lung cancer	CKM	Inverse variance weighted	1.23e-32	1	1
Lung cancer	CAPN1;CAPNS1	Inverse variance weighted	7.7e-34	1	1
Lung cancer	PSG4	Inverse variance weighted	3.08e-33	1	1
Lung cancer	SVEP1	Inverse variance weighted	1.2e-35	1	1
Lung cancer	DNAJC30	Inverse variance weighted	4.93e-32	1	1
Lung cancer	COL15A1	Inverse variance weighted	1.23e-32	1	1
Lung cancer	SWAP70	Inverse variance weighted	1.23e-32	1	1
Lung cancer	NELL1	Inverse variance weighted	4.93e-32	1	1
Lung cancer	IL12RB2	Inverse variance weighted	0	1	1
Lung cancer	MMP1	Inverse variance weighted	3.08e-33	1	1
Lung cancer	EPHB2	Inverse variance weighted	1.23e-32	1	1
Lung cancer	CEL	Inverse variance weighted	3.08e-33	1	1
Lung cancer	TIE1	Inverse variance weighted	1.97e-31	1	1
Lung cancer	CA6	Inverse variance weighted	0	1	1
Lung cancer	LMNB1	Inverse variance weighted	1.23e-32	1	1
Lung cancer	MMP8	Inverse variance weighted	1.23e-32	1	1
Lung cancer	NUDT12	Inverse variance weighted	7.7e-34	1	1
Lung cancer	SEMA3C	Inverse variance weighted	0	1	1
Lung cancer	GNLY	Inverse variance weighted	1.23e-32	1	1
Lung cancer	CLMP	Inverse variance weighted	0	1	1
Lung cancer	FAM20A	Inverse variance weighted	4.93e-32	1	1
Lung cancer	PGM1	Inverse variance weighted	1.23e-32	1	1
Lung cancer	MAN2B2	Inverse variance weighted	0	1	1
Lung cancer	FN1	Inverse variance weighted	3.08e-33	1	1
Lung cancer	WFIKKN2	Inverse variance weighted	1.97e-31	1	1
Lung cancer	NAGK	Inverse variance weighted	1.97e-31	1	1
Lung cancer	CCL5	Inverse variance weighted	3.08e-33	1	1
Lung cancer	COL18A1	Inverse variance weighted	0	1	1
Lung cancer	HGFAC	Inverse variance weighted	0	1	1
Lung cancer	SPINK2	Inverse variance weighted	1.97e-31	1	1
Lung cancer	FRZB	Inverse variance weighted	4.93e-32	1	1
Lung cancer	PPID	Inverse variance weighted	4.93e-32	1	1
Lung cancer	SERPINA1	Inverse variance weighted	0	1	1
Lung cancer	CLEC3B	Inverse variance weighted	0	1	1
Lung cancer	PLEKHA7	Inverse variance weighted	7.7e-34	1	1
Lung cancer	ITIH5	Inverse variance weighted	4.93e-32	1	1
Lung cancer	DKK1	Inverse variance weighted	3.08e-33	1	1
Lung cancer	FCER2	Inverse variance weighted	7.7e-34	1	1
Lung cancer	IGFLR1	Inverse variance weighted	1.23e-32	1	1
Lung cancer	FUT5	Inverse variance weighted	0	1	1
Lung cancer	GP1BA	Inverse variance weighted	1.97e-31	1	1
Lung cancer	TLR4;LY96	Inverse variance weighted	1.23e-32	1	1
Lung cancer	SIRPB1	Inverse variance weighted	1.23e-32	1	1
Lung cancer	GFRA2	Inverse variance weighted	0	1	1
Lung cancer	MANBA	Inverse variance weighted	4.93e-32	1	1
Lung cancer	CHL1	Inverse variance weighted	1.23e-32	1	1
