# Supplementary material for: Proteome-wide mendelian randomization study implicates therapeutic targets in common cancers
Source: J Transl Med. 2023 Sep 21;21:646. doi: 10.1186/s12967-023-04525-5 (PMC10512580; doi:10.1186/s12967-023-04525-5)
Supplement: Supplementary file 1 — Additional file 1: Table S1. Instrumental variables of plasma proteins used in MR analysis. Table S2. The sources for all statistical summary datasets used in this study. Table S3. Casual effects between 3 site-specific cancers and 13 identified proteins in the bidirectional MR analysis. Table S4. The results of heterogeneity analysis. Table S5. Investigating the Previous Genome-Wide Significant Associations of SNPs as Genetic Instruments for Potential Causal Proteins. Table S6. Genetic Instruments for Drug Targets Validated in External Validation. Table S7. Current anticancer medications and corresponding targets for cancer treatment. Table S8. Current medications targeting potential causal proteins. Table S9. Distinct target groups of identified proteins. Figure S1. Colocalization Analysis of Plasma Proteins for prostate cancer. The diamond purple points represent SNPs that exhibit the lowest combined P-value in both protein GWAS and cancer GWAS analyses. Figure S2. Colocalization Analysis of Plasma Proteins for breast cancer.The diamond purple points represent SNPs that exhibit the lowest combined P-value in both protein GWAS and cancer GWAS analyses. Figure S3. Colocalization Analysis of Plasma Proteins for lung cancer. The diamond purple points represent SNPs that exhibit the lowest combined P-value in both protein GWAS and cancer GWAS analyses. Figure S4. Protein–protein interaction network between identified proteins and cancer-associated medication targets. Green circles represent the targets of current medications for prostate cancer; Red circles represent potential drug targets identified in this study; Blue circles represent the current medications targets that interact with potential drug targets. R-detailed code. [file 12967_2023_4525_MOESM1_ESM.zip › Table S5.xlsx]

## Sheet: Sheet1
Table S5. Investigating the Previous Genome-Wide Significant Associations of SNPs as Genetic Instruments for Potential Causal Proteins
Protein	SNP	trait	catalog	effect_allele	proxy_SNP	r2	proxy_effect_allele	beta	se	pval	ancestry	pmid
KDELC2	rs74911261	Breast cancer	GWAS	A	NA	NA	NA	-0.1989	0.03026	5e-11	European	29058716
KDELC2	rs74911261	Renal cell carcinoma	GWAS	A	NA	NA	NA	0.3436	0.05401	2e-10	European	28598434
KDELC2	rs74911261	Impedance of arm left	GWAS	A	NA	NA	NA	-0.02964	0.00532	2.52e-08	European	UKBB
KDELC2	rs74911261	Impedance of arm right	GWAS	A	NA	NA	NA	-0.03211	0.005297	1.35e-09	European	UKBB
KDELC2	rs74911261	Leiomyoma of uterus	GWAS	A	NA	NA	NA	0.005247	0.000849	6.31e-10	European	UKBB
KDELC2	rs74911261	Self-reported uterine fibroids	GWAS	A	rs141379009	0.86833	A	0.006771	0.000912	1.16e-13	European	UKBB
KDELC2	rs74911261	Impedance of whole body	GWAS	A	rs149934734	0.86833	A	-0.03217	0.005775	2.54e-08	European	UKBB
KDELC2	rs74911261	Lymphocyte count	GWAS	A	rs117706999	0.85961	A	0.07265	0.01192	1.09e-09	European	27863252
KDELC2	rs74911261	Plateletcrit	GWAS	A	rs117706999	0.85961	A	0.08307	0.01212	7.14e-12	European	27863252
KDELC2	rs74911261	Lymphocyte counts	GWAS	A	rs117706999	0.85961	A	0.07265	0.01189	1e-09	European	27863252
SPINT2	rs71354995	Platelet count	GWAS	G	rs4803999	0.86812	G	0.03011	0.004035	8.51e-14	European	27863252
SPINT2	rs71354995	Mean platelet volume	GWAS	G	rs2304176	0.85444	C	-0.02958	0.004332	8.59e-12	European	27863252
GSTP1	rs1695	Height	GWAS	G	NA	NA	NA	-0.01047	0.001806	6.75e-09	European	UKBB
GSTP1	rs1695	Mean corpuscular hemoglobin	GWAS	G	rs749174	0.92535	A	-0.02173	0.003678	3.44e-09	European	27863252
GSTP1	rs1695	Mean corpuscular volume	GWAS	G	rs749174	0.92535	A	-0.02268	0.003667	6.19e-10	European	27863252
CTSS	rs41271951	Blood protein levels	GWAS	G	NA	NA	NA	0.9647	0.07276	4e-40	European	28240269
CPNE1	rs12481228	Height	GWAS	C	NA	NA	NA	0.032	0.0038	4.1e-17	Mixed	28146470
CPNE1	rs12481228	Height	GWAS	C	NA	NA	NA	0.03703	0.002874	5.56e-38	European	UKBB
CPNE1	rs12481228	Basal metabolic rate	GWAS	C	rs77120309	1	C	0.02849	0.002679	2.11e-26	European	UKBB
CPNE1	rs12481228	Leg fat-free mass left	GWAS	C	rs77120309	1	C	0.02651	0.002661	2.26e-23	European	UKBB
CPNE1	rs12481228	Leg predicted mass left	GWAS	C	rs77120309	1	C	0.02622	0.002643	3.39e-23	European	UKBB
CPNE1	rs12481228	Weight	GWAS	C	rs77120309	1	C	0.02658	0.003531	5.21e-14	European	UKBB
CPNE1	rs12481228	Height	GWAS	C	rs6060524	1	C	0.04441	0.006849	8.95e-11	European	23754948
CPNE1	rs12481228	Hip circumference adjusted for BMI	GWAS	C	rs6060524	1	C	0.044	0.0075	3.9e-09	Mixed	25673412
CPNE1	rs12481228	Height	GWAS	C	rs1118233	1	C	NA	NA	5.57e-09	European	20881960
CPNE1	rs12481228	Height	GWAS	C	rs1118233	1	C	0.04441	0.006849	8.95e-11	European	23754948
CPNE1	rs12481228	Height	GWAS	C	rs1118233	1	C	0.052	0.0049	2.4e-26	European	25282103
CPNE1	rs12481228	Impedance of leg left	GWAS	C	rs111306810	1	C	-0.02107	0.003687	1.1e-08	European	UKBB
CPNE1	rs12481228	Impedance of leg right	GWAS	C	rs111306810	1	C	-0.02225	0.003659	1.2e-09	European	UKBB
CPNE1	rs12481228	Impedance of whole body	GWAS	C	rs111306810	1	C	-0.01742	0.003084	1.61e-08	European	UKBB
CPNE1	rs12481228	Leg predicted mass right	GWAS	C	rs111306810	1	C	0.02749	0.002644	2.66e-25	European	UKBB
ISLR2	rs2959011	Self-reported hypertension	GWAS	T	rs12440952	0.98756	T	0.007241	0.00112	9.97e-11	European	UKBB
ISLR2	rs2959011	Vascular or heart problems diagnosed by doctor: high blood pressure	GWAS	T	rs12440952	0.98756	T	0.007051	0.001135	5.22e-10	European	UKBB
ICAM5	rs281439	Lymphocyte count	GWAS	C	NA	NA	NA	-0.03172	0.004358	3.34e-13	European	27863252
ICAM5	rs281439	Plasma soluble intercellular adhesion molecule 1 ICAM 1 females	GWAS	C	rs281440	0.98778	C	NA	NA	1.5e-16	European	18604267
ICAM5	rs281439	Soluble intercellular adhesion molecule 1 ICAM 1	GWAS	C	rs281440	0.98778	C	NA	NA	1.6e-52	European	21533024
ICAM5	rs281439	Intercellular adhesion molecule 1	pQTL	C	NA	NA	NA	0.2179	0.03511	5.47e-10	European	30111768
ICAM5	rs281439	Intercellular adhesion molecule 1	pQTL	C	rs281440	0.98778	C	-0.5971	0.0284	3.8e-98	European	29875488
SFTPB	rs1130866	Granulysin	pQTL	A	NA	NA	NA	-0.1387	0.0253	4.37e-08	European	29875488
