# Supplementary material for: Proteome-wide mendelian randomization study implicates therapeutic targets in common cancers
Source: J Transl Med. 2023 Sep 21;21:646. doi: 10.1186/s12967-023-04525-5 (PMC10512580; doi:10.1186/s12967-023-04525-5)
Supplement: Supplementary file 1 — Additional file 1: Table S1. Instrumental variables of plasma proteins used in MR analysis. Table S2. The sources for all statistical summary datasets used in this study. Table S3. Casual effects between 3 site-specific cancers and 13 identified proteins in the bidirectional MR analysis. Table S4. The results of heterogeneity analysis. Table S5. Investigating the Previous Genome-Wide Significant Associations of SNPs as Genetic Instruments for Potential Causal Proteins. Table S6. Genetic Instruments for Drug Targets Validated in External Validation. Table S7. Current anticancer medications and corresponding targets for cancer treatment. Table S8. Current medications targeting potential causal proteins. Table S9. Distinct target groups of identified proteins. Figure S1. Colocalization Analysis of Plasma Proteins for prostate cancer. The diamond purple points represent SNPs that exhibit the lowest combined P-value in both protein GWAS and cancer GWAS analyses. Figure S2. Colocalization Analysis of Plasma Proteins for breast cancer.The diamond purple points represent SNPs that exhibit the lowest combined P-value in both protein GWAS and cancer GWAS analyses. Figure S3. Colocalization Analysis of Plasma Proteins for lung cancer. The diamond purple points represent SNPs that exhibit the lowest combined P-value in both protein GWAS and cancer GWAS analyses. Figure S4. Protein–protein interaction network between identified proteins and cancer-associated medication targets. Green circles represent the targets of current medications for prostate cancer; Red circles represent potential drug targets identified in this study; Blue circles represent the current medications targets that interact with potential drug targets. R-detailed code. [file 12967_2023_4525_MOESM1_ESM.zip › Table S6.xlsx]

## Sheet: Sheet1
Table S5. Genetic Instruments for Drug Targets Validated in External Validation
Proteins	Cancers	SNP	effect allele	other allele	beta	se	pval	or	or_lci95	or_uci95
CTSS	prostate cancer	rs41271951	G	A	-0.0034	0.001512	0.024636	0.996608	0.993659	0.999566
KDELC2	prostate cancer	rs74911261	A	G	-0.00468	0.00172	0.006519	0.995331	0.991981	0.998693
SPINT2	prostate cancer	rs71354995	G	A	0.002805	0.000836	0.00079	1.00281	1.00117	1.00445
TNFRSF10B	prostate cancer	rs4871844	T	C	-0.01965	0.005347	0.000239	0.980546	0.970323	0.990876
decode_CTSS_same	prostate cancer	rs41271951	G	A	-0.00415	0.001845	0.024636	0.995862	0.992267	0.99947
decode_KDELC2_same	prostate cancer	rs74911261	A	G	-0.00603	0.002216	0.006519	0.993989	0.989681	0.998316
decode_SPINT2_same	prostate cancer	rs71354995	G	A	0.004032	0.001201	0.00079	1.00404	1.00168	1.00641
decode_TNFRSF10B_same	prostate cancer	rs4871844	C	T	-1.17058	0.318597	0.000239	0.310186	0.166122	0.579185
CPNE1	breast cancer	rs12481228	C	G	-0.00137	0.000517	0.008009	0.99863	0.997619	0.999643
GDI2	breast cancer	rs2890364	G	A	-0.00406	0.001648	0.013843	0.995951	0.992738	0.999174
PDIA3	breast cancer	rs3110081	C	T	0.004025	0.002037	0.048165	1.00403	1.00003	1.00805
decode_CPNE1_same	breast cancer	rs12481228	C	G	-0.00123	0.000466	0.008009	0.998766	0.997854	0.999678
decode_GDI2_same	breast cancer	rs2890364	A	G	-0.0097	0.003941	0.013843	0.990347	0.982726	0.998026
decode_PDIA3_same	breast cancer	rs3110081	T	C	0.02317	0.011726	0.048165	1.02344	1.00019	1.04723
