# Supplementary material for: Proteome-wide mendelian randomization study implicates therapeutic targets in common cancers
Source: J Transl Med. 2023 Sep 21;21:646. doi: 10.1186/s12967-023-04525-5 (PMC10512580; doi:10.1186/s12967-023-04525-5)
Supplement: Supplementary file 1 — Additional file 1: Table S1. Instrumental variables of plasma proteins used in MR analysis. Table S2. The sources for all statistical summary datasets used in this study. Table S3. Casual effects between 3 site-specific cancers and 13 identified proteins in the bidirectional MR analysis. Table S4. The results of heterogeneity analysis. Table S5. Investigating the Previous Genome-Wide Significant Associations of SNPs as Genetic Instruments for Potential Causal Proteins. Table S6. Genetic Instruments for Drug Targets Validated in External Validation. Table S7. Current anticancer medications and corresponding targets for cancer treatment. Table S8. Current medications targeting potential causal proteins. Table S9. Distinct target groups of identified proteins. Figure S1. Colocalization Analysis of Plasma Proteins for prostate cancer. The diamond purple points represent SNPs that exhibit the lowest combined P-value in both protein GWAS and cancer GWAS analyses. Figure S2. Colocalization Analysis of Plasma Proteins for breast cancer.The diamond purple points represent SNPs that exhibit the lowest combined P-value in both protein GWAS and cancer GWAS analyses. Figure S3. Colocalization Analysis of Plasma Proteins for lung cancer. The diamond purple points represent SNPs that exhibit the lowest combined P-value in both protein GWAS and cancer GWAS analyses. Figure S4. Protein–protein interaction network between identified proteins and cancer-associated medication targets. Green circles represent the targets of current medications for prostate cancer; Red circles represent potential drug targets identified in this study; Blue circles represent the current medications targets that interact with potential drug targets. R-detailed code. [file 12967_2023_4525_MOESM1_ESM.zip › Table S7.xlsx]

## Sheet: Sheet1
Table S7. Current anticancer medications and corresponding targets for cancer treatment
Prostate cancer
Medication	Target	Gene Name	Uniprot ID	Pharmacological Action	Action	Status
Etoposide	DNA topoisomerase 2-alpha	TOP2A	P11388	Yes	inhibitor	Approved
	DNA topoisomerase 2-beta	TOP2B	Q02880	Yes	inhibitor
Uracil	Dihydropyrimidine dehydrogenase [NADP(+)]	DPYD	Q12882	Unknown	Unknown	Experimental/Investigational
	Uridine-cytidine kinase-like 1	UCKL1	Q9NWZ5	Unknown	Unknown
	Uracil-DNA glycosylase	ung	Q8X444	Unknown	Unknown
	Ribosomal small subunit pseudouridine synthase A	rsuA	P0AA43	Unknown	Unknown
	Uracil-DNA glycosylase	udg	Q5SKC5	Unknown	Unknown
	Pyrimidine-nucleoside phosphorylase	pdp	P77836	Unknown	Unknown
Apalutamide	Androgen receptor	AR	P10275	Yes	antagonist	Approved/Investigational
	GABA(A) Receptor: Gamma-aminobutyric acid receptor subunit alpha-1	GABRA1	P14867	Yes	antagonist
	GABA(A) Receptor: Gamma-aminobutyric acid receptor subunit beta-1	GABRB1	P18505	Yes	antagonist
	GABA(A) Receptor: Gamma-aminobutyric acid receptor subunit delta	GABRD	O14764	Yes	antagonist
	GABA(A) Receptor: Gamma-aminobutyric acid receptor subunit epsilon	GABRE	P78334	Yes	antagonist
	GABA(A) Receptor: Gamma-aminobutyric acid receptor subunit gamma-1	GABRG1	Q8N1C3	Yes	antagonist
	GABA(A) Receptor: Gamma-aminobutyric acid receptor subunit pi	GABRP	O00591	Yes	antagonist
	GABA(A) Receptor: Gamma-aminobutyric acid receptor subunit theta	GABRQ	Q9UN88	Yes	antagonist
Enzalutamide	Androgen receptor	AR	P10275	Yes	inhibitor	Approved
abiraterone	Steroid 17-alpha-hydroxylase/17,20 lyase	CYP17A1	P05093	Yes	inhibitor	Approved
Relugolix	Gonadotropin-releasing hormone receptor	GNRHR	P30968	Yes	Antagonist	Approved/Investigational
Leuprolide	Gonadotropin-releasing hormone receptor	GNRHR	P30968	Yes	Antagonist	Approved/Investigational
Goserelin	Gonadotropin-releasing hormone receptor	GNRHR	P30968	Yes	Antagonist	Approved
	Lutropin-choriogonadotropic hormone receptor	LHCGR	P22888	Yes	Agonist
Bardoxolone	Caspase-8	CASP8	Q14790	Unknown	Unknown	Investigational
Breast Cancer
Medication	Target	Gene Name	Uniprot ID	Pharmacological Action	Action	Status
Cyclophosphamide	DNA	NA	NA	Yes	cross-linking/alkylation	Approved/Investigational
	Nuclear receptor subfamily 1 group I member 2	NR1I2	O75469	Unknow	Unknow
Doxorubicin	DNA topoisomerase 2-alpha	TOP2A	P11388	Yes	inhibitor	Approved/Investigational
	DNA	NA	NA	Yes	Intercalation
	Nucleolar and coiled-body phosphoprotein 1	NOLC1	Q14978	Unknow	Unknow
	DNA topoisomerase 1	TOP1	P11387	Yes	inhibitor
	DNA topoisomerase 2-beta	TOP2B	Q02880	Yes	inhibitor
Epirubicin	DNA	NA	NA	Unknown	intercalation	Approved
	DNA topoisomerase 2-alpha	TOP2A	P11388	Unknown	Inhibitor
Fluorouracil	DNA	NA	NA	Yes	incorporation into and destabilization	Approved
	RNA	NA	NA	Yes	incorporation into and destabilization
	Thymidylate synthase	TYMS	P04818	Yes	unknown
Methotrexate	Thymidylate synthase	TYMS	P04818	Yes	inhibitor	Approved
	Bifunctional purine biosynthesis protein PURH	ATIC	P31939	Yes	inhibitor
	Dihydrofolate reductase	DHFR	P00374	Yes	inhibitor
Mitomycin	DNA	NA	NA	Yes	cross-linking/alkylation	Approved
Neratinib	Epidermal growth factor receptor	EGFR	P00533	Yes	inhibitor	Approved/Investigational
Tamoxifen	Estrogen receptor alpha	ESR1	P03372	Yes	antagonist	Approved
	Estrogen receptor beta	ESR2	Q92731	Yes	antagonist
	Protein kinase C	PRKCA	P17252	Yes	inhibitor
	Sex hormone-binding globulin	SHBG	P04278	Yes	inducer
	3-beta-hydroxysteroid-Delta(8),Delta(7)-isomerase	EBP	Q15125	unknown	inhibitor
	Androgen receptor	AR	P10275	unknown	unknown
	Potassium voltage-gated channel subfamily H member 2	KCNH2	Q12809	unknown	inhibitor
	Nuclear receptor subfamily 1 group I member 2	NR1I2	O75469	unknown	unknown
	Estrogen-related receptor gamma	ESRRG	P62508	unknown	unknown
	Mitogen-activated protein kinase 8	MAPK8	P45983	unknown	modulator
Trastuzumab	Receptor tyrosine-protein kinase erbB-2	ERBB2	P04626	Yes	binder antibody	Approved/Investigational
Tucatinib	Receptor tyrosine-protein kinase erbB-2	ERBB2	P04626	Yes	inhibitor	Approved/Investigational
	Receptor tyrosine-protein kinase erbB-3	ERBB3	P21860	unknown	inhibitor
Uracil	Dihydropyrimidine dehydrogenase [NADP(+)]	DPYD	Q12882	Unknown	Unknown	Experimental/Investigational
	Uridine-cytidine kinase-like 1	UCKL1	Q9NWZ5	Unknown	Unknown
	Uracil-DNA glycosylase	ung	Q8X444	Unknown	Unknown
	Ribosomal small subunit pseudouridine synthase A	rsuA	P0AA43	Unknown	Unknown
	Uracil-DNA glycosylase	udg	Q5SKC5	Unknown	Unknown
	Pyrimidine-nucleoside phosphorylase	pdp	P77836	Unknown	Unknown
Lung cancer
Medication	Target	Gene Name	Uniprot ID	Pharmacological Action	Action	Status
Atezolizumab	Programmed cell death 1 ligand 1	CD274	Q9NZQ7	Yes	inhibitor antibody	Approved/Investigational
	Programmed cell death protein 1	PDCD1	Q15116	Yes	inhibitor
Docetaxel	Tubulin beta-1 chain	TUBB1	Q9H4B7	Yes	Unknown	Approved/Investigational
	Microtubule-associated protein 2	MAP2	P11137	Yes	Unknown
	Microtubule-associated protein 4	MAP4	P27816	Yes	Unknown
	Microtubule-associated protein tau	MAPT	P10636	Yes	Unknown
	Apoptosis regulator Bcl-2	BCL2	P10415	Unknown	Unknown
	Nuclear receptor subfamily 1 group I member 2	NR1I2	O75469	Unknown	binder
Epirubicin	DNA	TOP2A	P11388	Unknown	intercalation	Approved
	DNA topoisomerase 2-alpha	UGT2B7	P16662	Unknown	inhibitor
Etoposide	DNA topoisomerase 2-alpha	TOP2A	P11388	Yes	inhibitor	Approved
	DNA topoisomerase 2-beta	TOP2B	Q02880	No	inhibitor
Gemcitabine	DNA	Unknown	Unknown	Yes	cross-linking/alkylation	Approved
	Ribonucleoside-diphosphate reductase large subunit	RRM1	P23921	Yes	inhibitor
	Thymidylate synthase	TYMS	P04818	Unknown	inhibitor
	UMP-CMP kinase	CMPK1	P30085	Unknown	inhibitor
Ifosfamide	DNA	NA	NA	Unknown	Unknown	Approved
	Nuclear receptor subfamily 1 group I member 2	NR1I2	O75469	Unknown	Unknown
Irinotecan	DNA topoisomerase I, mitochondrial	TOP1MT	Q969P6	Yes	inhibitor	Approved/Investigational
	DNA topoisomerase 1	TOP1	P11387	Yes	inhibitor
Vincristine	Tubulin beta chain	TUBB	P07437	Yes	inhibitor	Approved/Investigational
	Tubulin alpha-4A chain	TUBA4A	P68366	Yes	inhibitor
Osimertinib	Epidermal growth factor receptor	EGFR	P00533	Yes	inhibitor regulator	Approved
Dacomitinib	Epidermal growth factor receptor	EGFR	P00533	Yes	inhibitor	Approved/Investigational
Mitomycin	DNA	NA	NA	Unknown	Unknown	Approved
Paclitaxel	Tubulin beta-1 chain	TUBB1	Q9H4B7	Yes	inhibitor	Approved
	Apoptosis regulator Bcl-2	BCL2	P10415	Yes	inhibitor
	Microtubule-associated protein 4	MAP4	P27816	Yes	Unknown
	Microtubule-associated protein 2	MAP2	P11137	Yes	Unknown
	Microtubule-associated protein tau	MAPT	P10636	Yes	Unknown
	Nuclear receptor subfamily 1 group I member 2	NR1I2	O75469	Unknown	inducer
Vinblastine	Tubulin alpha-1A chain	TUBA1A	Q71U36	Yes	binder	Approved
	Tubulin beta chain	TUBB	P07437	Yes	binder
	Tubulin delta chain	TUBD1	Q9UJT1	Yes	binder
	Tubulin gamma-1 chain	TUBG1	P23258	Yes	binder
	Tubulin epsilon chain	TUBE1	Q9UJT0	Yes	binder
	Transcription factor AP-1	JUN	P05412	No	unknown
