# Supplementary material for: Proteome-wide mendelian randomization study implicates therapeutic targets in common cancers
Source: J Transl Med. 2023 Sep 21;21:646. doi: 10.1186/s12967-023-04525-5 (PMC10512580; doi:10.1186/s12967-023-04525-5)
Supplement: Supplementary file 1 — Additional file 1: Table S1. Instrumental variables of plasma proteins used in MR analysis. Table S2. The sources for all statistical summary datasets used in this study. Table S3. Casual effects between 3 site-specific cancers and 13 identified proteins in the bidirectional MR analysis. Table S4. The results of heterogeneity analysis. Table S5. Investigating the Previous Genome-Wide Significant Associations of SNPs as Genetic Instruments for Potential Causal Proteins. Table S6. Genetic Instruments for Drug Targets Validated in External Validation. Table S7. Current anticancer medications and corresponding targets for cancer treatment. Table S8. Current medications targeting potential causal proteins. Table S9. Distinct target groups of identified proteins. Figure S1. Colocalization Analysis of Plasma Proteins for prostate cancer. The diamond purple points represent SNPs that exhibit the lowest combined P-value in both protein GWAS and cancer GWAS analyses. Figure S2. Colocalization Analysis of Plasma Proteins for breast cancer.The diamond purple points represent SNPs that exhibit the lowest combined P-value in both protein GWAS and cancer GWAS analyses. Figure S3. Colocalization Analysis of Plasma Proteins for lung cancer. The diamond purple points represent SNPs that exhibit the lowest combined P-value in both protein GWAS and cancer GWAS analyses. Figure S4. Protein–protein interaction network between identified proteins and cancer-associated medication targets. Green circles represent the targets of current medications for prostate cancer; Red circles represent potential drug targets identified in this study; Blue circles represent the current medications targets that interact with potential drug targets. R-detailed code. [file 12967_2023_4525_MOESM1_ESM.zip › Table S8.xlsx]

## Sheet: Sheet1
Table S8. Current medications targeting potential causal proteins
Prostate cancer
Target	Gene	Uniprot ID	Medication	Indication	Actions
KDEL (Lys-Asp-Glu-Leu) containing 2, isoform CRA_a	KDELC2	A0A024R3C4	NA	NA	NA
Kunitz-type protease inhibitor 2	SPINT2	O43291	NA	NA	NA
Tumor necrosis factor receptor superfamily member 10B	TNFRSF10B	O14763	HGS-TR2J	Investigated for treatment in solid tumors.	unknown
			Lexatumumab	Investigated for treatment in cancer.	unknown
			Bioymifi	Bioymifi is a small molecule that acts as a tumor necrosis factor-related apoptosis-induced ligand (TRAIL) mimetic. Upon binding to the death receptor 5 (DR5) on cancer cells, bioymifi triggers apoptosis, possibly through a caspase-dependent pathway. Bioymifi is currently being investigated as an anti-tumor agent.	binder
Glutathione S-transferase P	GSTP1	P09211	Chlorambucil	For treatment of chronic lymphatic (lymphocytic) leukemia, childhood minimal-change nephrotic syndrome, and malignant lymphomas including lymphosarcoma, giant follicular lymphoma, Hodgkin's disease, non-Hodgkin's lymphomas, and Waldenström’s Macroglobulinemia.	substrate
			Etoposide	For use in combination with other chemotherapeutic agents in the treatment of refractory testicular tumors and as first line treatment in patients with small cell lung cancer. Also used to treat other malignancies such as lymphoma, non-lymphocytic leukemia, and glioblastoma multiforme.	substrate
			Cisplatin	For the treatment of metastatic testicular tumors, metastatic ovarian tumors and advanced bladder cancer.	substrate
			Carboplatin	Carboplatin is indicated in combination with an established combination of chemotherapeutic agents for the initial treatment of advanced ovarian carcinoma.Carboplatin is also indicated for the palliative treatment of ovarian carcinoma, recurrent after prior chemotherapy	substrate
			Deoxycholic acid	For improvement in appearance of moderate to severe fullness associated with submental fat in adults.	unknown
			Clozapine	Clozapine is indicated for the treatment of severely ill patients with schizophrenia who fail to respond adequately to standard antipsychotic treatment.	unknown
			Acetaminophen	For the treatment of mild to moderate pain and reduction of fever	substrate
			Busulfan	For use in combination with cyclophosphamide as a conditioning regimen prior to allogeneic hematopoietic progenitor cell transplantation for chronic myelogenous (myeloid, myelocytic, granulocytic) leukemia (FDA has designated busulfan as an orphan drug for this use). It is also used as a component of pretransplant conditioning regimens in patients undergoing bone marrow transplantation for acute …	substrate
			Oxaliplatin	Used in combination with infusional 5-FU/LV, is indicated for the treatment of advanced carcinoma of the colon or rectum and for adjuvant treatment of stage III colon cancer patients who have undergone complete resection of the primary tumor.	substrate
			Curcumin	Has been investigated for the treatment and supportive care of clinical conditions including proteinuria, breast cancer, multiple myeloma, depression, and Non Small Cell Lung Cancer (NSCLC)	inhibitor
			Etacrynic acid	For the treatment of high blood pressure and edema caused by diseases like congestive heart failure, liver failure, and kidney failure.	inhibitor
			Glutathione	For nutritional supplementation, also for treating dietary shortage or imbalance	unknown
			Clomipramine	Used to treat obsessive-compulsive disorder and disorders with an obsessive-compulsive component (e.g. depression, schizophrenia, Tourette’s disorder). Unlabeled indications include: depression, panic disorder, chronic pain (e.g. central pain, idiopathic pain disorder, tension headache, diabetic peripheral neuropathy, neuropathic pain), cataplexy and associated narcolepsy (limited evidence), auti…	inhibitor
			Troglitazone	For the treatment of Type II diabetes mellitus. It is used alone or in combination with a sulfonylurea, metformin, or insulin as an adjunct to diet and exercise.	unknown
			alpha-Tocopherol succinate	Its antioxidant abilities may be used to help assist in preventing or treating a number of different conditions like cardiovascular disease, ocular conditions, diabetes, cancer and more	inhibitor
			D-alpha-Tocopherol acetate	It is protective against cardiovascular disease and some forms of cancer and has also demonstrated immune-enhancing effects.	inhibitor
Cathepsin S	CTSS	P25774	Fostamatinib	For use in the treatment of chronic immune thrombocytopenia (ITP) in patients who have had insufficient response to previous therapy	inhibitor
Breast cancer
Target	Gene	Uniprot ID	Medication	Indication	Actions
Copine-1	CPNE1	Q99829	Theophylline	For the treatment of the symptoms and reversible airflow obstruction associated with chronic asthma and other chronic lung diseases, such as emphysema and chronic bronchitis.	unknown
Protein disulfide-isomerase A3	PDIA3	P30101	Copper	For use in the supplementation of total parenteral nutrition and in contraception with intrauterine devices	unknown
			Zinc	Zinc can be used for the treatment and prevention of zinc deficiency/its consequences, including stunted growth and acute diarrhea in children, and slowed wound healing. It is also utilized for boosting the immune system, treating the common cold and recurrent ear infections, as well as preventing lower respiratory tract infections	unknown
			Zinc acetate	Zinc acetate is a medication used to treat zinc deficiency.	unknown
			Zinc chloride	Zinc chloride injections are indicated for use total parenteral nutrition to maintain zinc serum levels and prevent deficiency syndromes.	binder
			Zinc sulfate	Zinc sulfate is a common zinc supplement in parenteral nutrition.	binder
Rab GDP dissociation inhibitor	GDI2	P50395	NA	NA	NA
Immunoglobulin superfamily containing leucine-rich repeat protein 2	ISLR2	Q6UXK2	NA	NA	NA
Cathepsin F	CTSF	Q9UBX1	NA	NA	NA
Lung cancer
Target	Gene	Uniprot ID	Medication	Indication	Actions
Pulmonary surfactant-associated protein B	SFTPB	P07988	NA	NA	NA
Intercellular adhesion molecule 5	ICAM5	Q9UMF0	NA	NA	NA
Leucine-rich repeat transmembrane protein FLRT3	FLRT3	Q9NZU0	NA	NA	NA
